1  
2  
3  
4  
5  
6  
7  
8  
9  
10  
11  
12  
13  
14  
15  
16  
17  
18  
19  
20  
21  
22  
23  
24  
25  
26  
27  
28  
29  
30  
31  
32  
33  
34  
35

## Peripheral Coupling Sites Formed by STIM1 Govern the Contractility of Vascular Smooth Muscle Cells

Vivek Krishnan<sup>1#</sup>, Sher Ali<sup>1#</sup>, Albert L. Gonzales<sup>2#</sup>, Pratish Thakore<sup>1</sup>, Caoimhin S. Griffin<sup>1</sup>, Evan Yamasaki<sup>1</sup>, Michael G. Alvarado<sup>1</sup>, Martin T. Johnson<sup>3</sup>, Mohamed Trebak<sup>3</sup>, and Scott Earley<sup>1\*</sup>

<sup>1</sup>Department of Pharmacology, Center for Molecular and Cellular Signaling in the Cardiovascular System, University of Nevada, Reno School of Medicine, Reno, NV 89557-0318

<sup>2</sup>Department of Physiology & Cell Biology, Center for Molecular and Cellular Signaling in the Cardiovascular System, University of Nevada, Reno School of Medicine, Reno, NV 89557-0318

<sup>3</sup>Department of Cellular and Molecular Physiology, Penn State Cancer Institute, Penn State University, College of Medicine, Hershey, PA 17033

#These authors contributed equally to this work

\*Corresponding author

Short title: STIM1 forms Ca<sup>2+</sup> signaling microdomains in smooth muscle cells

**Address Correspondence To:** Scott Earley, Ph.D.  
University of Nevada, Reno School of Medicine  
Manville Health Sciences Building, Room 8  
MS-0318  
Reno, NV 89557-0318, USA  
Phone: (775) 784-4117  
Fax: (775) 784-1620  
Email: [searley@med.unr.edu](mailto:searley@med.unr.edu)

36 **Abstract**

37 Peripheral coupling between the sarcoplasmic reticulum (SR) and plasma membrane  
38 (PM) forms signaling complexes that regulate the membrane potential and contractility  
39 of vascular smooth muscle cells (VSMCs), although the mechanisms responsible for  
40 these membrane interactions are poorly understood. In many cells, STIM1 (stromal-  
41 interaction molecule 1), a single transmembrane-domain protein that resides in the  
42 endoplasmic reticulum (ER), transiently moves to ER-PM junctions in response to  
43 depletion of ER  $\text{Ca}^{2+}$  stores and initiates store-operated  $\text{Ca}^{2+}$  entry (SOCE). Fully  
44 differentiated VSMCs express STIM1 but exhibit only marginal SOCE activity. We  
45 hypothesized that STIM1 is constitutively active in contractile VSMCs and maintains  
46 peripheral coupling. In support of this concept, we found that the number and size of  
47 SR-PM interacting sites were decreased and SR-dependent  $\text{Ca}^{2+}$  signaling processes  
48 were disrupted in freshly isolated cerebral artery SMCs from tamoxifen-inducible, SMC-  
49 specific STIM1-knockout (*Stim1-smKO*) mice. VSMCs from *Stim1-smKO* mice also  
50 exhibited a reduction in nanoscale colocalization between  $\text{Ca}^{2+}$ -release sites on the SR  
51 and  $\text{Ca}^{2+}$ -activated ion channels on the PM, accompanied by diminished channel  
52 activity. *Stim1-smKO* mice were hypotensive and resistance arteries isolated from them  
53 displayed blunted contractility. These data suggest that STIM1 – independent of SR  
54  $\text{Ca}^{2+}$  store depletion – is critically important for stable peripheral coupling in contractile  
55 VSMCs.

56 **Keywords:** STIM1, vascular smooth muscle, cerebral artery, peripheral coupling sites

57

58

## 59 Introduction

60 Subcellular  $\text{Ca}^{2+}$ -signaling microdomains formed by interactions between the  
61 sarcoplasmic reticulum (SR) and the plasma membrane (PM) are vital for many  
62 physiological processes, including regulation of the contractility of vascular smooth  
63 muscle cells (VSMCs) (1, 2).  $\text{Ca}^{2+}$  signals that occupy these compartments are typified  
64 by  $\text{Ca}^{2+}$  sparks – large-amplitude  $\text{Ca}^{2+}$  transients that reflect optically detected  $\text{Ca}^{2+}$  ions  
65 released into the cytosol from the SR through clusters of type 2 ryanodine receptors  
66 (RyR2s).  $\text{Ca}^{2+}$  sparks activate clusters of large-conductance  $\text{Ca}^{2+}$ -activated  $\text{K}^+$  (BK)  
67 channels on the PM, generating transient, macroscopic outward  $\text{K}^+$  currents that  
68 hyperpolarize the PM (1, 3, 4). A complementary  $\text{Ca}^{2+}$  signaling pathway that causes  
69 VSMC membrane depolarization and elevated contractility is formed by interactions  
70 between inositol 1,4,5-trisphosphate receptors ( $\text{IP}_3\text{Rs}$ ) on the SR and monovalent  
71 cation-selective,  $\text{Ca}^{2+}$ -activated TRPM4 (transient receptor potential melastatin 4)  
72 channels on the PM.  $\text{Ca}^{2+}$  released from the SR through  $\text{IP}_3\text{Rs}$  activates  $\text{Na}^+$  influx  
73 through TRPM4, causing depolarization of the PM and increased VSMC contractility (2,  
74 5). The close association of the SR and PM creates subcellular compartments where  
75 the local  $\text{Ca}^{2+}$  ion concentration can reach the micromolar range required for activation  
76 of BK and TRPM4 channels under physiological conditions (6). In non-excitabile cells,  
77 endoplasmic reticulum (ER)-PM junctions and associated proteins have been well  
78 characterized (7, 8). In contrast, SR-PM junctional areas of VSMCs and the essential  
79 proteins that mediate these interactions remain poorly understood.

80 The ER-PM junctions of non-excitabile cells are highly specialized hubs for ion  
81 channel signaling cascades. These spaces are the sites of one of the most ubiquitous

82 receptor-regulated  $\text{Ca}^{2+}$  entry pathway in such cells, termed store-operated  $\text{Ca}^{2+}$  entry  
83 (SOCE), which is mediated by the ER-resident  $\text{Ca}^{2+}$ -sensing protein STIM1 (stromal  
84 interaction molecule 1) and  $\text{Ca}^{2+}$ -selective channels of the Orai group on the PM (9-11).  
85 STIM1 is a single-pass transmembrane ER/SR protein that possesses a low-affinity  
86  $\text{Ca}^{2+}$ -sensing EF-hand facing the lumen of the ER/SR (9, 12-30). Following store  
87 depletion by  $\text{IP}_3$ -producing receptor agonists, STIM1 acquires an extended  
88 conformation and migrates to ER-PM junctions, exposing a cytosolic STIM-Orai  
89 activating region that physically traps and activates Orai channels on the PM (9, 10, 12,  
90 18, 22, 24, 26, 29-35). The other STIM protein family member, STIM2, is structurally  
91 similar to STIM1. Fully differentiated VSMCs from systemic arteries express STIM1 but  
92 not STIM2 and do not exhibit detectable SOCE (36-38). Many species express  $\text{IP}_3\text{Rs}$   
93 but lack STIM and Orai proteins, suggesting that receptor-evoked  $\text{Ca}^{2+}$  signaling is not  
94 always complemented by the operation of STIM and Orai mechanisms (39).  
95 Evolutionary evidence indicates that Orai appeared before STIM, implying that STIM  
96 might have arisen to support the function of ER-PM junctions and only subsequently co-  
97 opted an existing Orai for SOCE (39). Additional accumulating evidence indicates that,  
98 in addition to its role in SOCE, mammalian STIM1 protein serves as an essential  
99 regulator of several other ion channels and signaling pathways. STIM1 both positively  
100 and negatively regulates the function of L-type voltage-gated  $\text{Ca}^{2+}$  channels (Cav1.2)  
101 (40), transient receptor potential canonical (TRPC) channels (41), and arachidonate-  
102 regulated  $\text{Ca}^{2+}$  (ARC) channels (42). It has also been reported to regulate the function  
103 of  $\text{Ca}^{2+}$  pumps, such as the SR/ER  $\text{Ca}^{2+}$  ATPase (SERCA) and PM  $\text{Ca}^{2+}$  ATPase  
104 (PMCA) as well as several cAMP-producing adenylyl cyclases at the PM (43-46).

105 In the current study, we investigated the role of STIM1 in the formation of stable  
106 peripheral coupling sites in native, contractile SMCs from cerebral arteries. We show  
107 that STIM1 is required for stable interactions between the SR and PM. We further show  
108 that this function of STIM1 is independent of SR Ca<sup>2+</sup> store depletion and acts to sustain  
109 subcellular Ca<sup>2+</sup> signaling pathways that are essential for the regulation of VSMC  
110 contractility.

## 111 **Results**

### 112 *Stim1-smKO mice lack STIM1 protein expression in VSMCs.*

113 Mice with *loxP* sites flanking exon 2 of the *Stim1* gene (*Stim1<sup>fl/fl</sup>* mice) were  
114 crossed with myosin heavy chain 11 (*Myh11*)-*cre*/ERT2 mice (47, 48), generating  
115 *Myh11-Cre-Stim1<sup>fl/wt</sup>* mice, in which *Myh11* promoter-driven *cre* expression is induced  
116 by injection of tamoxifen. Heterozygous *Myh11-Cre-Stim1<sup>fl/wt</sup>* mice were then  
117 intercrossed, yielding tamoxifen-inducible, SMC-specific *Stim1*-knockout mice (*Myh11-*  
118 *Cre-Stim1<sup>fl/fl</sup>*), hereafter termed *Stim1-smKO* mice. Cre-recombinase expression was  
119 induced in male *Stim1-smKO* mice by daily intraperitoneal injection of tamoxifen (100  
120  $\mu$ L, 10 mg/mL) for 5 days, beginning at 4–6 weeks of age. Controls for all experiments  
121 consisted of *Stim1-smKO* mice injected with the vehicle for tamoxifen (sunflower oil).  
122 Mice were used for experiments 1 week after the final injection. The Wes capillary  
123 electrophoresis immunoassay-based protein detection system was used for qualitative  
124 and quantitative assessment of STIM1 protein in smooth muscle tissues from *Stim1-*  
125 *smKO* and control mice. STIM1 protein was readily detected as a single band in  
126 cerebral artery, mesenteric artery, aortic, colonic, and bladder smooth muscle isolated  
127 from control mice, but was virtually undetectable in smooth muscle isolated from

128 tamoxifen-injected *Stim1*-smKO mice (Figure 1A). STIM1 protein levels normalized to  
129 total protein (Supplementary figure 1A) were significantly lower in cerebral artery, aortic,  
130 colonic, and bladder smooth muscle from tamoxifen-injected *Stim1*-smKO mice  
131 compared with controls (Figure 1A). In contrast, STIM1 protein expression was detected  
132 at similar levels in whole brains from both control and tamoxifen-injected *Stim1*-smKO  
133 mice (Figure 1A), reflecting STIM1 expression in brain cells apart from VSMCs.  
134 Tamoxifen injection had no effect on STIM1 protein levels in *Myh-11-Cre*-positive  
135 *Stim1*<sup>wt/wt</sup> mice (Supplementary figure 1B–G).

136 In further studies, single SMCs from cerebral arteries isolated from control and  
137 *Stim1*-smKO mice were enzymatically dispersed, immunolabeled with an anti-STIM1  
138 primary antibody, and imaged using a GSDIM (ground state depletion followed by  
139 individual molecule return) superresolution microscopy system, which we previously  
140 showed using DNA-origami-based nanorulers has a lateral resolution of 20–40 nm (49-  
141 51). VSMCs from control mice exhibited punctate STIM1 protein clusters (Figure 1B).  
142 Frequency analyses revealed that the sizes of these clusters were exponentially  
143 distributed, with a majority of clusters (~95%) ranging in area between 400 and 7600  
144 nm<sup>2</sup> (mean = 2135 ± 21 nm<sup>2</sup>; median = 800 nm<sup>2</sup>) (Figure 1C). STIM1 cluster density  
145 was significantly reduced in VSMCs isolated from *Stim1*-smKO mice (Figure 1D). The  
146 number of GSDIM events in VSMCs isolated from tamoxifen-injected *Stim1*-smKO mice  
147 was comparable to background levels observed in cells from control mice  
148 immunolabeled with secondary antibody only, providing further evidence of effective  
149 STIM1 knockdown (Supplementary figure 2A and B). Taken together, these data

150 demonstrate selective, tamoxifen-inducible SMC-specific knockout of STIM1 expression  
151 in *Stim1*-smKO mice.

152

153 *PM and SR coupling is diminished in VSMCs from Stim1-smKO mice.*

154 To investigate how STIM1 knockout affects PM and SR interactions, we  
155 costained native SMCs isolated from cerebral arteries of control and *Stim1*-smKO mice  
156 with Cell-Mask Deep Red and ER-Tracker green to label the PM and SR, respectively,  
157 as described in our prior publications (49, 52). Using live-cell structured illumination  
158 microscopy (SIM), we acquired Z-stack images of PM- and SR-labeled VSMCs as 0.25-  
159  $\mu\text{m}$  slices. We then reconstructed the 3D surfaces of the PM and SR from these images  
160 (Figure 2A), also generating a third surface indicating the sites of colocalization between  
161 the PM and SR (Figure 2A; Supplementary movies 1 and 2). The mean volume of the  
162 PM did not differ between *Stim1*-smKO and control mice, but the volume of the SR was  
163 smaller in cells isolated from *Stim1*-smKO mice (Figure 2B and C). The overall PM-SR  
164 colocalization was significantly reduced in VSMCs from *Stim1*-smKO mice compared  
165 with controls (Figure 2D). As shown in representative image galleries of individual  
166 colocalization sites (Figure 2E), the majority of PM-SR coupling sites in cells from both  
167 groups formed spherical surfaces, but some of the larger structures exhibited an  
168 elongated morphology. Frequency analyses showed that the volume of individual  
169 colocalization sites in cells from both groups exhibited an exponential distribution  
170 (Figure 2G). In addition, the number of coupling sites per unit volume and mean volume  
171 of individual sites were smaller in cells from *Stim1*-smKO mice compared with those

172 from controls (Figure 2H and I). These data indicate that interactions between the PM  
173 and SR are decreased by *Stim1* knockout in VSMCs.

174

175 *Stim1* knockout decreases colocalization of BK and RyR2 protein clusters.

176 BK channels on the PM of VSMCs are functionally coupled with RyR2s on the  
177 SR (1). Therefore, we investigated how *Stim1* knockout affects the nanoscale structure  
178 of the BK-RyR2 signaling complex using GSDIM superresolution microscopy. Freshly  
179 isolated VSMCs from *Stim1*-smKO and control mice were co-immunolabeled for RyR2  
180 and the BK channel pore-forming subunit BK $\alpha$  and imaged using GSDIM in  
181 epifluorescence illumination mode. The resulting superresolution localization maps  
182 (Figure 3A, left-most panels) showed that both proteins were present as defined  
183 clusters in VSMCs. Using an objects-based analysis (OBA) approach (53, 54) as  
184 described in previous publications (49, 51, 52, 55, 56), we generated new maps of  
185 RyR2 clusters that overlapped at the resolution limit of our microscope system (~20-40  
186 nm) with the centroid of each BK cluster, and BK clusters that overlapped with the  
187 centroid of each RyR2 cluster. These two maps were then merged to reveal colocalized  
188 RyR2-BK channel protein clusters in VSMCs from both groups of animals that were  
189 below the resolution of our GSDIM system (Figure 3A, middle and right-most panels).  
190 Particle analysis of these clusters showed that the density of individual BK protein  
191 clusters (number of clusters per unit area) was similar for both groups of animals  
192 (Figure 3B), whereas the density of individual RyR2 clusters was lower in VSMCs from  
193 *Stim1*-smKO mice compared with controls (Figure 3C). In both groups, the sizes of  
194 individual BK channel and RyR2 clusters followed an exponential distribution (Figure 3B



195 and C). The mean size of individual BK clusters was smaller in VSMCs from *Stim1*-  
196 smKO mice compared with those from controls (Figure 3B); in contrast, the mean size  
197 of RyR2 clusters was slightly larger in cells from *Stim1*-smKO mice (Figure 3C). In  
198 terms of colocalization, this analysis showed a significant reduction in the density of  
199 colocalized BK-RyR2 protein clusters in VSMCs from *Stim1*-smKO mice compared with  
200 controls (Figure 3D). The mean size of colocalizing clusters from *Stim1*-smKO mice was  
201 smaller compared with those from control mice (Figure 3D), and the sizes of BK-RyR2  
202 colocalization sites in cerebral artery SMCs from both groups exhibited an exponential  
203 distribution (Figure 3D). These data indicate that *Stim1* knockout decreases the  
204 frequency and size of close contact sites between RyR2 and BK channel protein  
205 clusters in VSMCs.

206

207 *Stim1* knockout decreases colocalization of TRPM4 and IP<sub>3</sub>R protein clusters.

208 TRPM4 channels on the PM are functionally coupled with IP<sub>3</sub>Rs on the SR (2).  
209 Therefore, we also investigated how interactions between PM TRPM4 channels and SR  
210 IP<sub>3</sub>Rs were altered by *Stim1* knockout. Freshly isolated VSMCs from control and *Stim1*-  
211 smKO mice were co-immunolabeled for TRPM4 and IP<sub>3</sub>R and imaged using GSDIM in  
212 epifluorescence illumination mode. The resulting GSDIM localization maps showed that  
213 these proteins are present as discrete clusters in cells (Figure 4A, left-most panels).

214 We next used OBA to identify and map individual and colocalized TRPM4 and  
215 IP<sub>3</sub>R protein clusters (Figure 4A, middle and right-most panels). This analysis showed  
216 that the densities of individual TRPM4 and IP<sub>3</sub>R clusters were similar in both groups

217 (Figure 4B and C) and that their sizes were exponentially distributed (Figure 4B and C).  
218 The mean sizes of individual TRPM4 and IP<sub>3</sub>R clusters were smaller in VSMCs from  
219 *Stim1*-smKO mice compared with those from controls. (Figure 4B and C). The density of  
220 colocalized TRPM4-IP<sub>3</sub>R cluster sites did not differ between groups (Figure 4D, left), but  
221 the sizes of these colocalized clusters were smaller in cells from *Stim1*-smKO mice  
222 compared with those from controls (Figure 4D, middle). Like individual clusters,  
223 colocalized clusters exhibited an exponential distribution (Figure 4D, right).

224

### 225 *Stim1* knockout alters the properties of Ca<sup>2+</sup> sparks.

226 To investigate how *Stim1* knockout alters fundamental Ca<sup>2+</sup> signaling  
227 mechanisms, we loaded freshly isolated VSMCs with the Ca<sup>2+</sup>-sensitive fluorophore  
228 Fluo-4-AM and imaged them using live-cell, high-speed, high-resolution spinning-disk  
229 confocal microscopy. Spontaneous Ca<sup>2+</sup> sparks were present in cerebral artery SMCs  
230 from both control (Figure 5A; Supplementary movie 3) and *Stim1*-smKO (Figure 5B;  
231 Supplementary movie 4) mice. The frequency of Ca<sup>2+</sup> spark events did not differ  
232 between groups (Figure 5C). However, the mean amplitude of Ca<sup>2+</sup> spark events was  
233 significantly greater in VSMCs isolated from *Stim1*-smKO mice compared with those  
234 from controls (Figure 5D). Further analyses revealed that spatial spreads, durations,  
235 and decay times of individual Ca<sup>2+</sup> spark events were significantly greater in VSMCs  
236 isolated from *Stim1*-smKO mice compared with those taken from control mice, but rise  
237 times did not differ (Figure 5E–H). To investigate the effects of *Stim1* knockout on total  
238 SR Ca<sup>2+</sup> store load, we applied a bolus of caffeine (10 mM) to Fluo-4-AM-loaded  
239 VSMCs isolated from control and *Stim1*-smKO mice. The peak amplitude of caffeine-

240 evoked global increases in cytosolic  $[Ca^{2+}]$  did not differ between groups (Figure 5I),  
241 indicating that *Stim1* knockout did not alter total SR  $[Ca^{2+}]$ . Therefore, alterations in the  
242 properties of  $Ca^{2+}$  sparks associated with the knockout of *Stim1* are not the result of  
243 changes in SR  $Ca^{2+}$  load.

244

245 *Stim1* knockout diminishes physiological BK and TRPM4 channel activity.

246 We next used patch-clamp electrophysiology to investigate how knockout of  
247 *Stim1* affects the activity of BK and TRPM4 channels in VSMCs. When  $Ca^{2+}$  sparks  
248 activate clusters of BK channels at the PM, they generate macroscopic  $K^+$  currents  
249 termed spontaneous transient outward currents (STOCs) (1). Here, we recorded  
250 STOCs over a range of membrane potentials using the amphotericin B perforated  
251 patch-clamp configuration, which allows the membrane potential to be controlled without  
252 disrupting intracellular  $Ca^{2+}$  signaling pathways (49, 52). The frequencies and  
253 amplitudes of STOCs were lower in VSMCs from *Stim1*-smKO mice compared with  
254 those from controls at all membrane potentials greater than -60 mV (Figure 6A, B and  
255 C). To determine if diminished STOC activity was attributable to a decrease in the total  
256 number of BK channels available for activation at the PM, we measured whole-cell BK  
257 channel currents. Cerebral artery SMCs isolated from *Stim1*-smKO and control mice  
258 were patch-clamped in the conventional whole-cell configuration, and whole-cell  $K^+$   
259 currents were recorded during application of voltage ramps. Using the selective BK  
260 blocker paxilline to isolate BK channel currents, we found that whole-cell BK current  
261 amplitude did not differ between VSMCs from control and *Stim1*-smKO mice (Figure 6D  
262 and E), indicating that the number of BK channels available for activation and their

263 functionality was not altered by *Stim1* knockout. Also, *Stim1* knockout did not alter  
264 mRNA levels of BK  $\alpha$ - or  $\beta$ 1-subunits or RyR2s in cerebral arteries (Supplementary  
265 figure 3A). These findings indicate that diminished STOC activity following knockout of  
266 *Stim1* may result from impaired functional coupling of RyR2 with BK channels.

267 TRPM4 is a  $\text{Ca}^{2+}$ -activated, monovalent cation-selective channel that is  
268 impermeable to divalent cations (57). At membrane potentials in the physiological range  
269 for VSMCs (-70 to -30 mV), TRPM4 channels conduct inward  $\text{Na}^+$  currents that  
270 depolarize the plasma membrane in response to increases in intraluminal pressure and  
271 receptor-dependent vasoconstrictor agonists (58, 59). Under native conditions, TRPM4  
272 channels are activated by  $\text{Ca}^{2+}$  released from the SR through  $\text{IP}_3\text{Rs}$ , generating  
273 transient inward cation currents (TICCs) (2, 60). To determine the effects of STIM1  
274 knockout on TRPM4 activity, we recorded TICCs using the amphotericin B perforated  
275 patch-clamp configuration (60). In agreement with previous reports (5, 59), we found  
276 that TICC activity in VSMCs from control mice was increased following application of  
277 negative pressure (-20 mmHg) through the patch pipette to stretch the plasma  
278 membrane, an effect that was attenuated by the selective TRPM4 blocker, 9-  
279 phenanthrol (Figure 6F). TICC activity and amplitude in VSMCs isolated from *Stim1*-  
280 smKO mice were significantly reduced compared with those from controls (Figure 6F,  
281 G, and H). To determine if these differences were attributable to changes in TRPM4  
282 channel function or availability, we activated TRPM4 currents in VSMCs from *Stim1*-  
283 smKO and control mice using an internal solution containing 200  $\mu\text{M}$  free  $\text{Ca}^{2+}$  and  
284 compared whole-cell TRPM4 currents in both groups by patch-clamping VSMCs in the  
285 conventional whole-cell configuration (61). The TRPM4-sensitive component of the

286 current was isolated by applying 9-phenanthrol. We found that whole-cell TRPM4  
287 current amplitudes did not differ between VSMCs from control and *Stim1*-smKO mice  
288 (Figure 6I and J), suggesting that the number of TRPM4 channels available for  
289 activation at the PM was not altered by *Stim1* knockout. In addition, *Stim1* knockout did  
290 not alter mRNA levels of TRPM4 subunits or any of the IP<sub>3</sub>R subtypes (1,2, or 3) in  
291 cerebral arteries (Supplementary figure 3B). These findings suggest that diminished  
292 TICC activity following knockout of *Stim1* results from impaired functional coupling of  
293 IP<sub>3</sub>Rs with TRPM4 channels.

294 *The contractility of resistance arteries from Stim1-smKO mice is blunted.*

295 Knockout of *Stim1* in VSMCs decreased the activity of BK and TRPM4 channels  
296 under physiological recording conditions. These channels have opposing effects on  
297 VSMC membrane potential, contractility and arterial diameter, with BK channels causing  
298 dilation (1) and TRPM4 channels causing constriction (62). Thus, the overall functional  
299 impact of deficient channel activity is not immediately apparent. Therefore, to  
300 investigate the net consequences of *Stim1* knockout on arterial contractile function, we  
301 employed a series of *ex vivo* pressure myography experiments. Constrictions of intact  
302 cerebral pial arteries in response to a depolarizing concentration (60 mM) of  
303 extracellular KCl did not differ between groups (Figure 7A), suggesting that knocking out  
304 *Stim1* in cerebral artery SMCs did not grossly alter voltage-dependent Ca<sup>2+</sup> influx or  
305 underlying contractile processes. Contractile responses to increases in intraluminal  
306 pressure (myogenic vasoconstriction) were evaluated by measuring steady-state  
307 luminal diameter at intraluminal pressures over a range of 5 to 140 mmHg in the  
308 presence (active response) and absence (passive response) of extracellular Ca<sup>2+</sup>.

309 Myogenic tone, calculated by normalizing active constriction to passive dilation, was  
310 significantly lower in cerebral arteries from *Stim1*-smKO mice compared with those from  
311 controls (Figure 7B and C). Contractile responses to the synthetic thromboxane A<sub>2</sub>  
312 receptor agonist U46619 were also significantly blunted in cerebral arteries from *Stim1*-  
313 smKO mice compared with those from vehicle-treated controls (Figure 7D and E).  
314 These data demonstrate that the ability of cerebral arteries from *Stim1*-smKO mice to  
315 contract in response to physiological stimuli is impaired. Additional investigations using  
316 3<sup>rd</sup>-order mesenteric arteries yielded similar findings (Figure 7F–J), indicating  
317 widespread vascular dysfunction in *Stim1*-smKO mice.

#### 318 *Stim1-smKO mice are hypotensive.*

319 Age-matched *Stim1*-smKO mice were surgically implanted with radio telemetry  
320 transmitters as previously described (63). After a recovery period (14 days), systolic and  
321 diastolic blood pressure (BP), heart rate (HR), and locomotor activity levels were  
322 recorded for 48 hours before tamoxifen injection (control). Systolic and diastolic BP, HR,  
323 and activity levels were again recorded for 48 hours, beginning 1 week after completing  
324 the tamoxifen injection protocol (*Stim1*-smKO). Normal diurnal variations were observed  
325 for all parameters (Figure 8). The mean systolic BP of *Stim1*-smKO mice was lower  
326 than that of control mice during both day and night cycles (Figure 8A), whereas diastolic  
327 BP did not differ between groups (Figure 8B). Mean arterial pressure (MAP) (Figure 8C)  
328 was lower in *Stim1*-smKO mice compared with controls at night, and trends to be  
329 different during the day ( $P = 0.056$ ). The pulse pressure of *Stim1*-smKO mice was lower  
330 than that of control mice during both day and night cycles (Figure 8D). HR (Figure 8E)  
331 and locomotor activity (Figure 8F) did not differ between groups. Injection of vehicle did

332 not affect BP, HR, or locomotor activity (Supplementary Figure 4). These data indicate  
333 that acute knockout of *Stim1* in SMCs lowers BP, probably due to diminished arterial  
334 contractility and decreased total peripheral resistance.

335

## 336 **Discussion**

337         Junctional membrane complexes formed by close interactions of the ER/SR with  
338 the PM are critical signaling hubs that regulate homeostatic and adaptive processes in  
339 nearly every cell type. The canonical function of STIM1 is to enable SOCE via Orai  
340 channels, but mounting evidence suggests that the protein has additional, SOCE-  
341 independent functions. Here we show that STIM1 is crucial for fostering SR-PM  
342 junctions and functional coupling between SR and PM ion channels that control VSMC  
343 contractility. In support of this concept, we found that the number and sizes of SR/PM  
344 coupling sites were significantly reduced in VSMCs from *Stim1*-smKO mice. *Stim1*  
345 knockout also altered the nanoscale architecture of ion channels in Ca<sup>2+</sup>-signaling  
346 complexes, transformed the properties of Ca<sup>2+</sup> sparks, and diminished BK and TRPM4  
347 channel activity under physiological recording conditions. Resistance arteries isolated  
348 from *Stim1*-smKO mice exhibited blunted responses to vasoconstrictor stimuli, and  
349 animals became hypotensive following acute knockout of *Stim1* in smooth muscle.  
350 Collectively, these findings demonstrate that STIM1 maintains stable peripheral  
351 coupling between the SR and PM of contractile VSMCs in a manner that is independent  
352 of Ca<sup>2+</sup> store depletion and SOCE. Loss of peripheral coupling in VSMCs following  
353 *Stim1* knockout has profound consequences, disrupting arterial function and BP  
354 regulation.



355           The SR-PM signaling domains of VSMCs are less orderly compared with those in  
356 cardiac and skeletal muscle cells and remain incompletely characterized. SR-PM  
357 junctions within the transverse (T) tubules of cardiomyocytes and skeletal muscle cells  
358 have regular, repeating structures that are formed, in part, by cytoskeletal elements and  
359 proteins of the junctophilin (64-66) and triadin (67, 68) families. In VSMCs, which lack T-  
360 tubules, SR-PM interactions occur at peripheral coupling sites that form throughout the  
361 periphery with no apparent pattern of distribution. Our research team has previously  
362 identified vital roles for microtubule networks (52) and junctophilin 2 (JPH2) (49) in the  
363 formation of peripheral coupling sites in VSMCs. Here, we found that knockout of *Stim1*  
364 in VSMCs reduced the number and sizes of SR-PM colocalization sites, demonstrating  
365 that STIM1 is necessary for the formation of stable SR-PM junctions in VSMCs with  
366 intact SR  $Ca^{2+}$  stores. Why is STIM1 active under these conditions? A simple  
367 explanation is that resting SR  $[Ca^{2+}]$  in fully differentiated, contractile VSMCs is  
368 sufficiently low to trigger constitutive activation of STIM1. This concept is supported by a  
369 report by Luik et al. (69), who showed that the half-maximal concentration ( $K_{1/2}$ ) of ER  
370  $Ca^{2+}$  for the activation of  $I_{CRAC}$  ( $Ca^{2+}$  release-activated  $Ca^{2+}$  current) in Jurkat T cells is  
371  $169 \mu M$  and the  $K_{1/2}$  for redistribution of STIM1 to the PM is  $187 \mu M$ . These data are in  
372 close agreement with another study, which reported that the  $K_{1/2}$  of ER  $Ca^{2+}$  for  
373 redistribution of STIM1 in HeLa cells was  $210 \mu M$  and that for maximum redistribution  
374 was  $150 \mu M$  (70). Few studies have reported measurements of SR  $[Ca^{2+}]$  in native,  
375 contractile VSMCs. Using the low-affinity ratiometric  $Ca^{2+}$  indicator, mag-fura-2, one  
376 well-controlled study estimated that resting SR  $[Ca^{2+}]$  in contractile SMCs was  $\sim 110 \mu M$   
377 (4). Under these conditions, STIM1 is expected to be in a fully active configuration. It is



378 also possible that regional SR  $[Ca^{2+}]$  levels near active  $Ca^{2+}$ -release sites (RyRs and  
379  $IP_3R$ ) are lower than global SR  $[Ca^{2+}]$ , which could further stimulate STIM1 activity at  
380 these sites and reinforce junctional coupling. Thus, we put forward the concept that  
381 STIM1 is in an active state in quiescent contractile smooth muscle and is necessary for  
382 the formation of PM-SR junctional membrane contacts vital for contractile function. Our  
383 data further imply that, as VSMCs transition to a proliferative phenotype during the  
384 development of disease states associated with vascular remodeling, SR  $Ca^{2+}$  levels  
385 increase, leading to STIM1 inactivation, loss of peripheral coupling, and acquisition of  
386 SOCE activity (71).

387 Ion channel proteins in the membranes of excitable cells form discreet clusters  
388 whose sizes are exponentially distributed, a phenomenon that has been suggested to  
389 occur through stochastic self-assembly (72). Here, we found that acute knockout of  
390 STIM1 in VSMCs reduced the mean sizes of BK, TRPM4, and  $IP_3R$  protein clusters and  
391 slightly increased the mean size of RyR2 protein clusters. According to the stochastic  
392 model proposed by Sato et al. (72), the steady-state size of membrane protein clusters  
393 is limited by the probability of removal from the PM through recycling or degradation  
394 processes, with larger clusters having a higher likelihood of removal. Thus, the smaller  
395 size of BK, TRPM4, and  $IP_3R$  clusters following STIM1 knockout is likely a consequence  
396 of an increase in the rate of channel removal from the membrane. Accordingly, we  
397 propose that STIM1 increases the dwell time of BK, TRPM4, and  $IP_3R$ s proteins in the  
398 membrane, allowing larger clusters to form. This could occur through direct protein-  
399 protein interactions or via an indirect mechanism. Previous studies have provided  
400 evidence of direct interactions between STIM1 and  $IP_3R$ s (73, 74), but interactions

401 between STIM1 and BK or TRPM4 have not been reported. It is also possible that intact  
402 SR-PM junctions partially protect membrane proteins from endocytic and/or recycling  
403 cascades, allowing larger clusters to form before they are removed. RyR2 cluster size  
404 was very slightly increased following STIM1 knockout, possibly reflecting the slow  
405 turnover rate of these massive proteins. Interestingly, we previously found that  
406 disruption of peripheral coupling in VSMCs by depolymerizing microtubules (52) or  
407 through morpholino-based knockdown of JPH2 (49) did not alter BK channel protein  
408 cluster sizes. This lack of an effect on cluster size could be attributable to the acute  
409 methods used to interrupt peripheral coupling in these previous studies or to specific  
410 properties of SR-PM junctional sites maintained by STIM1.

411 Knockout of *Stim1* in VSMCs significantly impacted  $\text{Ca}^{2+}$  signaling, ion channel  
412 activity, vascular contractility, and the regulation of BP. We purport that all of these  
413 outcomes result from nanoscale disruptions in cellular architecture. The compromised  
414 structural integrity of subcellular  $\text{Ca}^{2+}$  signaling microdomains formed by interactions of  
415 the PM and SR likely accounts for the more extensive spatial spread of  $\text{Ca}^{2+}$  sparks and  
416 prolonged clearance by SERCA pumps, the PMCA and  $\text{Na}^+/\text{Ca}^{2+}$  exchangers, which  
417 extend the decay rate and duration of  $\text{Ca}^{2+}$  signals. Decreased nanoscale colocalization  
418 of BK with RyR2 and TRPM4 with  $\text{IP}_3\text{Rs}$  manifested as diminished  $\text{Ca}^{2+}$ -dependent  
419 activity of BK and TRPM4 channels (STOCs and TICCs), reflecting a loss in the  
420 functional coupling of  $\text{Ca}^{2+}$ -release sites on the SR and ion channels on the PM. The  
421 smaller sizes of BK and TRPM4 protein clusters on the PM following *Stim1* knockdown  
422 may also reduce BK and TRPM4 channel currents. At the intact blood vessel level, the  
423 diminished TRPM4 and BK channel activity resulted in impaired contractility in response

424 to physiological stimuli. This finding is interesting because our prior studies investigating  
425 the role of microtubular structures (52) and JPH2 (49) in maintaining peripheral coupling  
426 in VSMCs showed that disruption of PM-SR interactions caused cerebral arteries to  
427 become hypercontractile. In these studies, arterial hypercontractility resulted from  
428 interruption of the BK-RyR2 signaling pathway, which hyperpolarizes the VSMC  
429 membrane and balances the depolarizing and contractile influences of the TRPM4-IP<sub>3</sub>R  
430 cascade. *Stim1* knockout, in contrast, affected both pathways, indicating that STIM1  
431 influences peripheral coupling in a manner that differs from that of the microtubule  
432 network and JPH2 and further suggesting heterogeneity in the formation of junctional  
433 membrane complexes in VSMCs. Diminished arterial contractility following *Stim1*  
434 knockout resulted in a drop in arterial BP, probably owing to a decrease in total  
435 peripheral resistance. This finding differs from previous reports by other groups showing  
436 that, although myogenic tone and phenylephrine-induced vasoconstriction was blunted  
437 in mesenteric arteries from a constitutive SMC-specific STIM1-knockout model, resting  
438 BP was not affected in this model (75-77). This difference is likely due to elevated levels  
439 of circulating catecholamines, which increase HR and cardiac output and thereby  
440 compensate for diminished vascular resistance (77).

441 In summary, our data demonstrate a vital role for STIM1 in the formation and  
442 maintenance of critical Ca<sup>2+</sup>-signaling microdomains in contractile VSMCs that is  
443 independent of SR Ca<sup>2+</sup> store depletion. Disruptions in cellular architecture at the  
444 nanoscale level associated with the loss of STIM1 resulted in arterial dysfunction and  
445 impaired BP regulation, highlighting the essential nature of SR-PM junctions in  
446 cardiovascular control.

## 447 **Methods**

### 448 ***Animals***

449 All animal studies were performed in accordance with guidelines of the  
450 Institutional Animal Care and Use Committee (IACUC) of the University of Nevada,  
451 Reno. Mice were housed in cages on a 12-hour/12-hour day-night cycle with ad libitum  
452 access to food (standard chow) and water. All transgenic mouse strains were obtained  
453 from The Jackson Laboratory (Bar Harbor, ME, USA). Mice with *loxP* sites flanking exon  
454 2 of the *Stim1* gene (*Stim1<sup>fl/fl</sup>* mice) were crossed with myosin heavy chain 11 (*Myh11*)-  
455 *cre*/ERT2 mice (47, 48), generating *Myh11-Cre-Stim1<sup>fl/wt</sup>* mice. Heterozygous *Myh11*-  
456 *Cre-Stim1<sup>fl/wt</sup>* mice were then intercrossed, yielding tamoxifen-inducible, SMC-specific  
457 *Stim1*-knockout mice (*Myh11-Cre-Stim1<sup>fl/fl</sup>*).

### 458 ***Induction of STIM1 knockout***

459 Male *Myh11-Cre*-positive *Stim1*-floxed mice (*Myh11-Cre-Stim1<sup>fl/fl</sup>*) were  
460 intraperitoneally injected at 4–6 weeks of age with 100  $\mu$ L of a 10 mg/mL tamoxifen  
461 solution once daily for 5 days. Mice were used for experiments 1 week after the final  
462 injection. Littermate *Myh11-Cre-Stim1<sup>fl/fl</sup>* mice injected with the vehicle for tamoxifen  
463 (sunflower oil) were used as controls for all experiments.

### 464 ***Wes capillary electrophoresis***

465 Tissues isolated from mice were homogenized in ice-cold RIPA buffer (25 mM  
466 Tris pH 7.6, 150 mM NaCl, 1% Igepal CA-630, 1% sodium deoxycholate, 0.1% SDS)  
467 with protease inhibitor cocktail (Cell Biolabs, Inc., San Diego, CA) using a mechanical  
468 homogenizer followed by sonication. The resulting homogenate was centrifuged at

469 14,000 rpm for 20 minutes at 4°C, and the supernatant containing proteins was  
470 collected. Protein concentration was quantified with a BCA protein assay kit (Thermo  
471 Scientific, Waltham, MA) by absorbance spectroscopy using a 96-well plate reader.  
472 Proteins were then resolved by capillary electrophoresis using the Wes system  
473 (ProteinSimple, San Jose, CA, USA) and probed with an anti-STIM1 primary antibody  
474 (S6072; Sigma-Aldrich, St. Louis, MO, USA). Bands were analyzed using Compass for  
475 SW (ProteinSimple).

#### 476 ***SMC isolation***

477 Mice were euthanized by decapitation and exsanguination under isoflurane  
478 anesthesia. Cerebral pial arteries were isolated carefully in ice-cold Mg<sup>2+</sup>-containing  
479 physiological salt solution (Mg<sup>2+</sup>-PSS; 5 mM KCl, 140 mM NaCl, 2 mM MgCl<sub>2</sub>, 10 mM  
480 HEPES, and 10 mM glucose; pH 7.4, adjusted with NaOH) and then incubated in an  
481 enzyme cocktail containing 1 mg/mL papain (Worthington Biochemical Corp.,  
482 Lakewood, NJ, USA), 1 mg/mL dithiothreitol (DTT; Sigma-Aldrich), and 10 mg/mL  
483 bovine serum albumin (BSA; Sigma-Aldrich) for 12 minutes at 37°C. The arteries were  
484 then washed three times with Mg<sup>2+</sup>-PSS and incubated in 1 mg/mL collagenase type II  
485 (Worthington) in Mg<sup>2+</sup>-PSS for 14 minutes. The arteries were washed three times with  
486 Mg<sup>2+</sup>-PSS and then dissociated into single cells by triturating with a fire-polished glass  
487 Pasteur pipette.

#### 488 ***Visualization of PM-SR colocalization sites using SIM***

489 Cerebral pial artery SMCs were allowed to adhere onto poly-L-lysine-coated  
490 round coverslips (5 mm diameter) during a 30-minute incubation at 37°C with the SR

491 stain, ER-Tracker Green (Thermo Fisher Scientific; diluted 1:1000 in  $Mg^{2+}$ -PSS). After  
492 incubation, ER-Tracker Green was removed, and the PM stain Cell-Mask Deep Red  
493 (Thermo Fisher Scientific; diluted 1:1000 in  $Mg^{2+}$ -PSS) was added, and cells were  
494 incubated for 5 minutes at 37°C. Cell-Mask Deep Red was then removed and cells were  
495 washed with  $Mg^{2+}$ -PSS and imaged using a lattice light-sheet microscope (LLSM;  
496 Intelligent Imaging Innovations, Inc., Denver, CO) (78). Coverslips with stained cells  
497 were mounted onto a sample holder and placed in the LLSM bath, immersed in  $Mg^{2+}$ -  
498 PSS. Imaging was performed in SR-SIM mode, set to 100-ms exposures. For each cell,  
499 200 Z-steps were collected at a step size of 0.25  $\mu m$ . Imaging was limited to no more  
500 than 30 minutes for each coverslip to prevent artifacts caused by internalization of the  
501 plasma membrane dye. Surface reconstruction and colocalization analyses of PM and  
502 SR were performed using Imaris (Bitplane, Zurich, Switzerland) image analysis  
503 software. The Surface-Surface coloc plugin was used to visualize areas of the PM and  
504 SR that colocalized to form coupling sites.

### 505 ***GSDIM superresolution microscopy***

506 Ground state depletion microscopy followed by individual molecule return  
507 (GSDIM) was performed as described previously (49, 51, 52, 55, 56). Briefly, freshly  
508 isolated cerebral pial artery SMCs were allowed to adhere onto poly-L-lysine coated  
509 glass coverslips for 30 minutes. The cells were then fixed for 20 minutes with 2%  
510 paraformaldehyde, quenched with 0.4 mg/mL  $NaBH_4$ , and permeabilized with 0.1%  
511 Triton X-100. Thereafter, cells were blocked with 50% SEABLOCK blocking buffer  
512 (Thermo Fisher Scientific, Waltham, MA) for 2 hours and incubated overnight at 4°C  
513 with primary antibody (Anti-STIM1 – (4916) Cell Signaling Technologies, Danvers, MA;

514 Anti-BK $\alpha$ 1 – (APC-021) Alomone Labs, Jerusalem, Israel; Anti-RyR2 – (MA3-916)  
515 Thermo Fisher Scientific, Waltham, MA; Anti-TRPM4 – (ABIN572220) antibodies-  
516 online.com, Limerick, PA; Anti-IP<sub>3</sub>R – (ab5804) Abcam, Cambridge, UK) diluted in PBS  
517 containing 20% SEABLOCK, 1% BSA, and 0.05% Triton X-100. Cells were washed  
518 three times with 1X PBS after each step. After overnight incubation, unbound primary  
519 antibody was removed by washing four times with 20% SEABLOCK, after which cells  
520 were incubated with secondary antibodies (Alexa-Fluor 647– or Alexa-Fluor 568–  
521 conjugated goat anti-rabbit, goat anti-mouse, donkey anti-goat or donkey anti-rabbit as  
522 appropriate) at room temperature for 2 hours in the dark. After washing with 1X PBS,  
523 coverslip-plated cells were mounted onto glass depression slides in a thiol-based photo-  
524 switching imaging buffer consisting of 50 mM Tris/10 mM NaCl (pH 8), 10% glucose, 10  
525 mM mercaptoethylamine, 0.48 mg/mL glucose oxidase, and 58  $\mu$ g/mL catalase.  
526 Coverslips were sealed to depression slides with Twinsil dental glue (Picodent,  
527 Wipperfurth, Germany) to exclude oxygen and prevent rapid oxidation of the imaging  
528 buffer. Superresolution images were acquired in epifluorescence mode using a GSDIM  
529 imaging system (Leica, Wetzlar, Germany) equipped with an oil-immersion 160 $\times$  HCX  
530 Plan-Apochromat (NA 1.47) objective, an electron-multiplying charge-coupled device  
531 camera (EMCCD; iXon3 897; Andor Technology, Belfast, UK), and 500-mW, 532- and  
532 642-nm laser lines. Localization maps were constructed from images acquired at 100  
533 Hz for 25,000 frames using Leica LAX software. Post-acquisition image analyses of  
534 cluster size distribution were performed using binary masks of images in NIH ImageJ  
535 software. Object-based analysis was used to establish colocalization of proteins of  
536 interest in superresolution localization maps.

537

538 ***Patch-clamp electrophysiology***

539 Freshly isolated cerebral artery SMCs were transferred to the recording chamber and  
540 allowed to adhere to glass coverslips at room temperature for 20 minutes. Recording  
541 electrodes (3–4 M $\Omega$ ) were pulled on a model P-87 micropipette puller (Sutter Instruments,  
542 Novato, CA, USA) and polished using a MF-830 MicroForge (Narishige Scientific  
543 Instruments Laboratories, Long Island, NY, USA). Spontaneous transient outward  
544 currents (STOCs) and transient inward cation currents (TICCs) were recorded in Ca<sup>2+</sup>-  
545 containing PSS (134 mM NaCl, 6 mM KCl, 1 mM MgCl<sub>2</sub>, 2 mM CaCl<sub>2</sub>, 10 mM HEPES,  
546 and 10 mM glucose; pH 7.4, adjusted with NaOH). The patch pipette solution contained  
547 110 mM K-aspartate, 1 mM MgCl<sub>2</sub>, 30 mM KCl, 10 mM NaCl, 10 mM HEPES, and 5  $\mu$ M  
548 EGTA (pH 7.2, adjusted with NaOH). Amphotericin B (200  $\mu$ M), prepared on the day of  
549 the experiment, was included in the pipette solution to perforate the membrane. For all  
550 experiments, currents were recorded using an Axopatch 200B amplifier equipped with an  
551 Axon CV 203BU headstage (Molecular Devices). Currents were filtered at 1 kHz, digitized  
552 at 40 kHz, and stored for subsequent analysis. Clampex and Clampfit (version 10.2;  
553 Molecular Devices) were used for data acquisition and analysis, respectively. For STOCs,  
554 cells were clamped at a membrane potential manually spanning a range from -60 mV to  
555 0 mV. STOCs were defined as events > 10 pA, and their frequency was calculated by  
556 dividing the number of events by the time between the first and last event. Whole-cell K<sup>+</sup>  
557 currents were recorded using a step protocol (-100 to +100 mV in 20 mV steps for 500  
558 ms) from a holding potential of -80 mV. Whole-cell BK currents were calculated by current  
559 subtraction following administration of the selective BK channel blocker paxilline (1  $\mu$ M).



560 Current–voltage (I–V) plots were generated using currents averaged over the last 50 ms  
561 of each voltage step. The bathing solution contained 134 mM NaCl, 6 mM KCl, 10 mM  
562 HEPES, 10 mM glucose, 2 mM CaCl<sub>2</sub>, and 1 mM MgCl<sub>2</sub>; pH 7.4 (NaOH). The pipette  
563 solution contained 140 mM KCl, 1.9 mM MgCl<sub>2</sub>, 75 μM Ca<sup>2+</sup>, 10 mM HEPES, 0.1 mM  
564 EGTA, and 2 mM Na<sub>2</sub>ATP; pH 7.2 (KOH).

565 TICC<sub>s</sub>, induced by membrane stretch delivered by applying negative pressure  
566 (20 mmHg) through the recording electrode using a Clampex controlled pressure clamp  
567 HSPC-1 device (ALA Scientific Instruments Inc., Farmingdale, NY, USA), were recorded  
568 from cells clamped at a membrane potential of -70 mV. TICC activity was calculated as  
569 the sum of the open channel probability (*N*P<sub>o</sub>) of multiple 1.75-pA open states (5).

570 Conventional whole-cell TRPM4 currents were recorded using ramp protocol consisting  
571 of a 400 ms increasing ramp from -100 to +100 mV ending with 300 ms step at +100  
572 mV from a holding potential of -60 mV. A new ramp was applied every 2 s. TRPM4  
573 whole-cell currents were recorded in a bath solution consisting of (in mM): 156 NaCl,  
574 1.5 CaCl<sub>2</sub>, 10 glucose, 10 HEPES and 10 TEA-Cl; pH 7.4 (NaOH). The patch pipette  
575 solution contained (in mM): 156 CsCl, 8 NaCl, 1 MgCl<sub>2</sub> 10 mM HEPES; pH 7.4 (NaOH)  
576 and 200 μM free [Ca<sup>2+</sup>], adjusted with appropriate amount of CaCl<sub>2</sub> and EGTA as  
577 calculated using Max-Chelator software.

### 578 ***Quantitative droplet digital PCR***

579 Total RNA was extracted from arteries by homogenization in TRIzol reagent  
580 (Invitrogen, Carlsbad, CA), followed by purification using a Direct-zol RNA microprep kit  
581 (Zymo Research, Irvine, CA), DNase I treatment (Thermo Fisher Scientific), and reverse  
582 transcription into cDNA using qScript cDNA Supermix (Quanta Biosciences,

583 Gaithersburg, MD). Quantitative droplet digital PCR (ddPCR) was performed using  
584 QX200 ddPCR EvaGreen Supermix (Bio-Rad, Hercules, CA), custom-designed primers  
585 (Supplementary table S1), and cDNA templates. Generated droplet emulsions were  
586 amplified using a C1000 Touch Thermal Cycler (Bio-Rad), and the fluorescence  
587 intensity of individual droplets was measured using a QX200 Droplet Reader (Bio-Rad)  
588 running QuantaSoft (version 1.7.4; Bio-Rad). Analysis was performed using QuantaSoft  
589 Analysis Pro (version 1.0.596; Bio-Rad).

### 590 ***Ca<sup>2+</sup> imaging***

591 A liquid suspension (~0.2 mL) of freshly isolated VSMCs was placed in a  
592 recording chamber (RC-26GLP, Warner Instruments, Hamden, CT, USA) and allowed  
593 to adhere to glass coverslips for 20 minutes at room temperature. VSMCs were then  
594 loaded with the Ca<sup>2+</sup>-sensitive fluorophore, Fluo-4 AM (1 μM; Molecular Probes), in the  
595 dark for 20 minutes at room temperature in Mg<sup>2+</sup>-PSS. Cells were subsequently washed  
596 three times with Ca<sup>2+</sup>-containing PSS and incubated at room temperature for 20  
597 minutes in the dark to allow sufficient time for Fluo-4 de-esterification. Images were  
598 acquired using an iXon 897 EMCCD camera (Andor; 16 x 16 μm pixel size) coupled to a  
599 spinning-disk confocal head (CSU-X1; Yokogawa), with a 100x oil-immersion objective  
600 (Olympus; NA 1.45) at an acquisition rate of 33 frames per second (fps). Custom  
601 software provided by Dr. Adrian D. Bonev (University of Vermont) was used to analyze  
602 the properties of Ca<sup>2+</sup> sparks. The threshold for Ca<sup>2+</sup> spark detection was defined as  
603 local increases in fluorescence  $\geq 0.2 \Delta F/F_0$ .

604

605 ***Pressure myography***

606 Cerebral pial and 3<sup>rd</sup> order mesenteric arteries were carefully isolated in ice-cold  
607 Mg<sup>2+</sup>-PSS. Each artery was then cannulated and mounted in an arteriography chamber  
608 and superfused with oxygenated (21% O<sub>2</sub>/6% CO<sub>2</sub>/73% N<sub>2</sub>) Ca<sup>2+</sup>-PSS (119 mM NaCl<sub>2</sub>,  
609 4.7 mM KCl, 21 mM NaCO<sub>3</sub>, 1.18 mM KH<sub>2</sub>PO<sub>4</sub>, 1.17 mM MgSO<sub>4</sub>, 0.026 mM EDTA, 1.8  
610 mM CaCl<sub>2</sub>, and 4 mM glucose) at 37°C and allowed to stabilize for 15 minutes. Each  
611 artery was then pressurized to 110 mmHg using a pressure servo controller (Living  
612 Systems instruments, St. Albans City, VT, USA). Any kinks or bends were gently  
613 straightened out, the pressure was reduced to 5 mmHg, and the artery was allowed to  
614 stabilize for 15 minutes. The viability of each artery was assessed by measuring the  
615 response to high extracellular [K<sup>+</sup>] PSS (made isotonic by adjusting the [NaCl], 60 mM  
616 KCl, 63.7 mM NaCl). Arteries that contracted less than 10% were excluded from further  
617 investigation.

618 Myogenic tone was assessed by raising the intraluminal pressure from 5 mmHg  
619 to 140 mmHg in 20-mmHg increments, with the artery maintained at each pressure  
620 increment for 5 minutes (active response). The artery was then superfused for 15  
621 minutes at 5 mmHg intraluminal pressure with Ca<sup>2+</sup>-free PSS supplemented with EGTA  
622 (2 mM) and the voltage-dependent Ca<sup>2+</sup> channel blocker diltiazem (10 μM), followed by  
623 application of pressure increments from 5 mmHg to 140 mmHg (passive response). The  
624 artery lumen diameter was recorded using edge-detection software (IonOptix,  
625 Westwood, MA, USA). Myogenic reactivity at each intraluminal pressure was calculated  
626 as  $[1 - (\text{Active diameter}/\text{Passive Diameter})] \times 100$ .

627 In separate arteries, the contractile response to the thromboxane A<sub>2</sub> receptor  
628 agonist U46619 and α<sub>1</sub>-adrenergic receptor agonist phenylephrine was assessed in  
629 cerebral and mesenteric arteries, respectively. Arteries were pressurized to 20 mmHg to  
630 prevent the development of myogenic tone. Cumulative concentration response curves  
631 were produced through the addition of U46619 (0.01–1000 nM) or phenylephrine  
632 (0.001–100 μM) to the superfusing bath solution. Arteries were maintained at each  
633 concentration for 5 minutes or until a steady-state diameter was reached, before  
634 addition of the next concentration. Following the addition of the final concentration,  
635 arteries were bathed in Ca<sup>2+</sup>-free PSS to obtain the passive diameter. Contraction was  
636 calculated at each concentration as vasoconstriction (%) = [(lumen diameter at  
637 constriction – lumen diameter at baseline)/passive lumen diameter] × 100.

### 638 ***In vivo radiotelemetry***

639 *Stim1*-smKO mice were initially anesthetized using 4–5% isoflurane carried in  
640 100% O<sub>2</sub> (flushed at 1 L/min), after which anesthesia was maintained by adjusting  
641 isoflurane to 1.5–2%; preoperative analgesia was provided by subcutaneous injection of  
642 50 μg/kg buprenorphine (ZooPharm, Windsor, CO, USA). The neck was shaved and  
643 then sterilized with iodine. Under aseptic conditions, an incision (~1 cm) was made to  
644 separate the oblique and tracheal muscles and expose the left common carotid artery.  
645 The catheter of a radio telemetry transmitter (PA-C10; Data Science International,  
646 Harvard Bioscience, Inc., Minneapolis, MN, USA) was surgically implanted in the left  
647 common carotid artery and secured using non-absorbable silk suture threads. The body  
648 of the transmitter was embedded in a subcutaneous skin pocket under the right arm.  
649 After a 14-day recovery period, baseline BP, HR, and locomotor activity were recorded

650 in conscious mice for 48 hours using Ponemah 6.4 software (Data Science  
651 International). Parameters were measured for 20 seconds every 5 minutes. Mice were  
652 then injected with either vehicle or tamoxifen using the protocol described above; after 7  
653 days following the final injection, baseline BP readings, HR, and locomotor activity were  
654 re-recorded in conscious mice for 48 hours

### 655 ***Chemicals***

656 All chemicals used were obtained from Sigma-Aldrich (St. Louis, MO, USA)  
657 unless specified otherwise.

### 658 ***Statistical analysis***

659 All data are expressed as means  $\pm$  standard error of the mean (SEM) unless  
660 specified otherwise. Statistical analyses were performed using either unpaired Student's  
661 t-test or analysis of variance (ANOVA) as appropriate, and a P-value  $< 0.05$  was  
662 considered statistically significant. GraphPad Prism v8.2 (GraphPad Software, Inc.,  
663 USA) was used for statistical analyses and graphical presentations.

664

665

666

667

668

669

670

671 **Funding**

672 This study was supported by grants from the National Institutes of Health (NHLBI  
673 R35HL155008, R01HL137852, R01HL091905, R01HL139585, R01HL122770, R01HL146054,  
674 NINDS RF1NS110044, R61NS115132, and NIGMS P20GM130459 to SE; NHLBI  
675 R35HL150778 to MT; NHLBI K01HL138215 to ALG). The Transgenic Genotyping and  
676 Phenotyping Core at the COBRE Center for Molecular and Cellular Signaling in the  
677 Cardiovascular System, University of Nevada, Reno, is maintained by a grant from NIH/NIGMS  
678 (P20GM130459 Sub#5451). The High Spatial and Temporal Resolution Imaging Core at the  
679 COBRE Center for Molecular and Cellular Signaling in the Cardiovascular System, University of  
680 Nevada, Reno, is maintained by a grant from NIH/NIGMS (P20GM130459 Sub#5452).

681 **Author Contributions**

682 S.E., A.L.G., and M.T. conceived and initiated the project. S.E. supervised the project and  
683 designed experiments. V.K. performed GSDIM and SIM superresolution imaging and Wes  
684 protein-detection experiments. S.A. performed patch-clamp electrophysiology experiments.  
685 C.S.G. conducted and analyzed  $Ca^{2+}$  spark recordings. P.T. performed pressure myography  
686 and *in vivo* BP recording studies. E.Y. performed RT-ddPCR experiments. M.J. helped with the  
687 development of transgenic animal models and immunolabeling protocols. A.L.G. performed  
688 experiments demonstrating the feasibility of the project. V.K., S.A., P.T., E.Y., M.G.A., C.S.G.,  
689 and S.E. analyzed the data. V.K. and S.E. wrote the manuscript and prepared the figures. V.K.,  
690 S.A., A.L.G., M.T., and S.E. revised the manuscript.

691 **Competing Interests**

692 The authors declare that they have no competing interests.

693

694 **Figures**

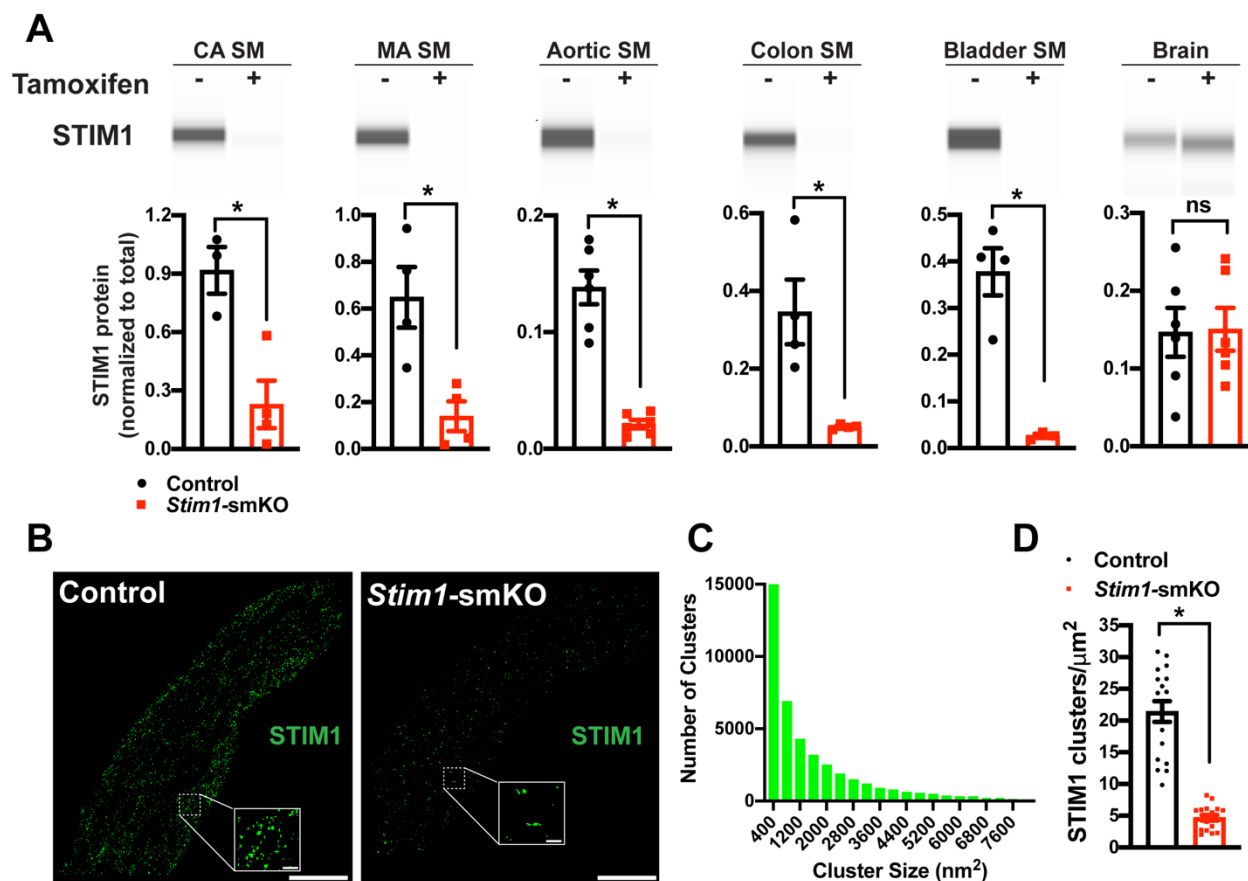

695

696 **Figure 1: Inducible, SMC-specific *Stim1* knockout.**

697 **(A)** Representative Wes protein capillary electrophoresis experiments, presented as

698 Western blots, showing STIM1 protein expression levels in smooth muscle tissues and

699 brains of vehicle- and tamoxifen-injected *Stim1-smKO* mice. Summary data showing

700 densitometric analyses of STIM1 protein expression in cerebral artery smooth muscle

701 (CA SM), mesenteric artery smooth muscle (MA SM), aortic smooth muscle, colonic

702 smooth muscle, bladder smooth muscle and brain, normalized to total protein (n = 3–6

703 mice/group; \*P < 0.05, unpaired t-test). ns, not significant. **(B)** Representative

704 superresolution localization maps of isolated cerebral artery SMCs from control and

705 *Stim1-smKO* mice immunolabeled for STIM1. Insets: enlarged areas highlighted by the

706 white squares in the main panels. Scale bars: 3  $\mu\text{m}$  (main panels) and 250 nm (inset  
707 panels). **(C)** Distribution plot of the surface areas of individual STIM1 clusters in cerebral  
708 artery SMCs isolated from control mice (n = 42726 clusters from 18 cells from 3 mice).  
709 **(D)** STIM1 cluster density in cerebral artery SMCs isolated from control and *Stim1*-  
710 smKO mice (n = 18 cells from 3 mice/group; \*P < 0.05, unpaired t-test).

711

712

713

714

715

716

717

718

719

720

721

722

723



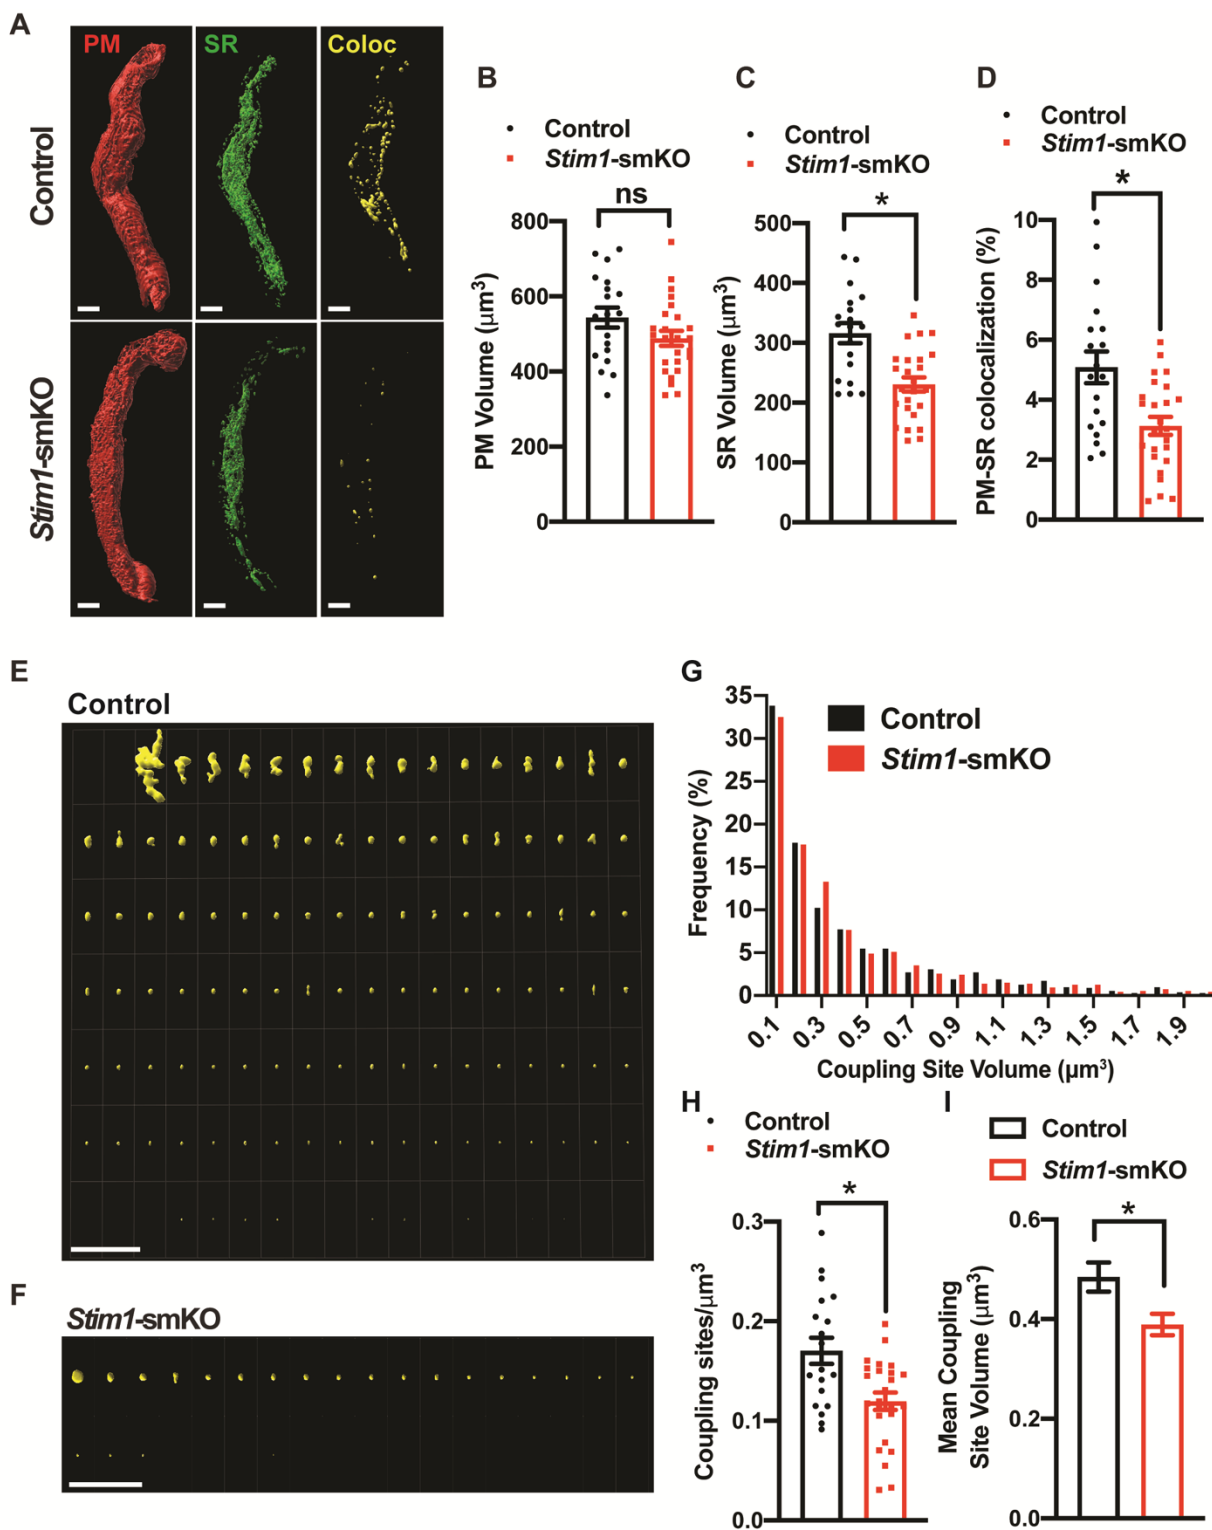

724

725 **Figure 2: *Stim1* knockout decreases the density and area of PM-SR coupling**

726 **sites.**

727 **(A)** Representative 3D surface reconstructions of cerebral artery SMCs isolated from  
728 control *Stim1*-smKO mice labeled with PM (red) and SR (green) dyes and imaged using  
729 SIM. Representations of colocalizing PM and SR surfaces (yellow), generated from  
730 surface reconstructions. Scale bar: 5  $\mu$ m. **(B and C)** PM and SR volumes and **(D)** PM-  
731 SR colocalization (%) in cells from control and *Stim1*-smKO mice. **(E and F)** Ensemble  
732 images of all PM-SR colocalization sites in single cells from the control and *Stim1*-  
733 smKO mice shown in panel A. Scale bar: 10  $\mu$ m **(G)** Frequency distribution of the  
734 volumes of individual PM-SR colocalization sites in VSMCs isolated from control and  
735 *Stim1*-smKO mice. **(H)** Densities and **(I)** mean volumes of individual coupling sites in  
736 VSMCs from control and *Stim1*-smKO mice. Data are for 1736 colocalization sites in 19  
737 cells from 6 mice for control and 1484 colocalization sites in 25 cells from 7 mice for  
738 *Stim1*-smKO (\*P < 0.05, unpaired t-test). ns, not significant.

739

740

741

742

743

744

745

746

747

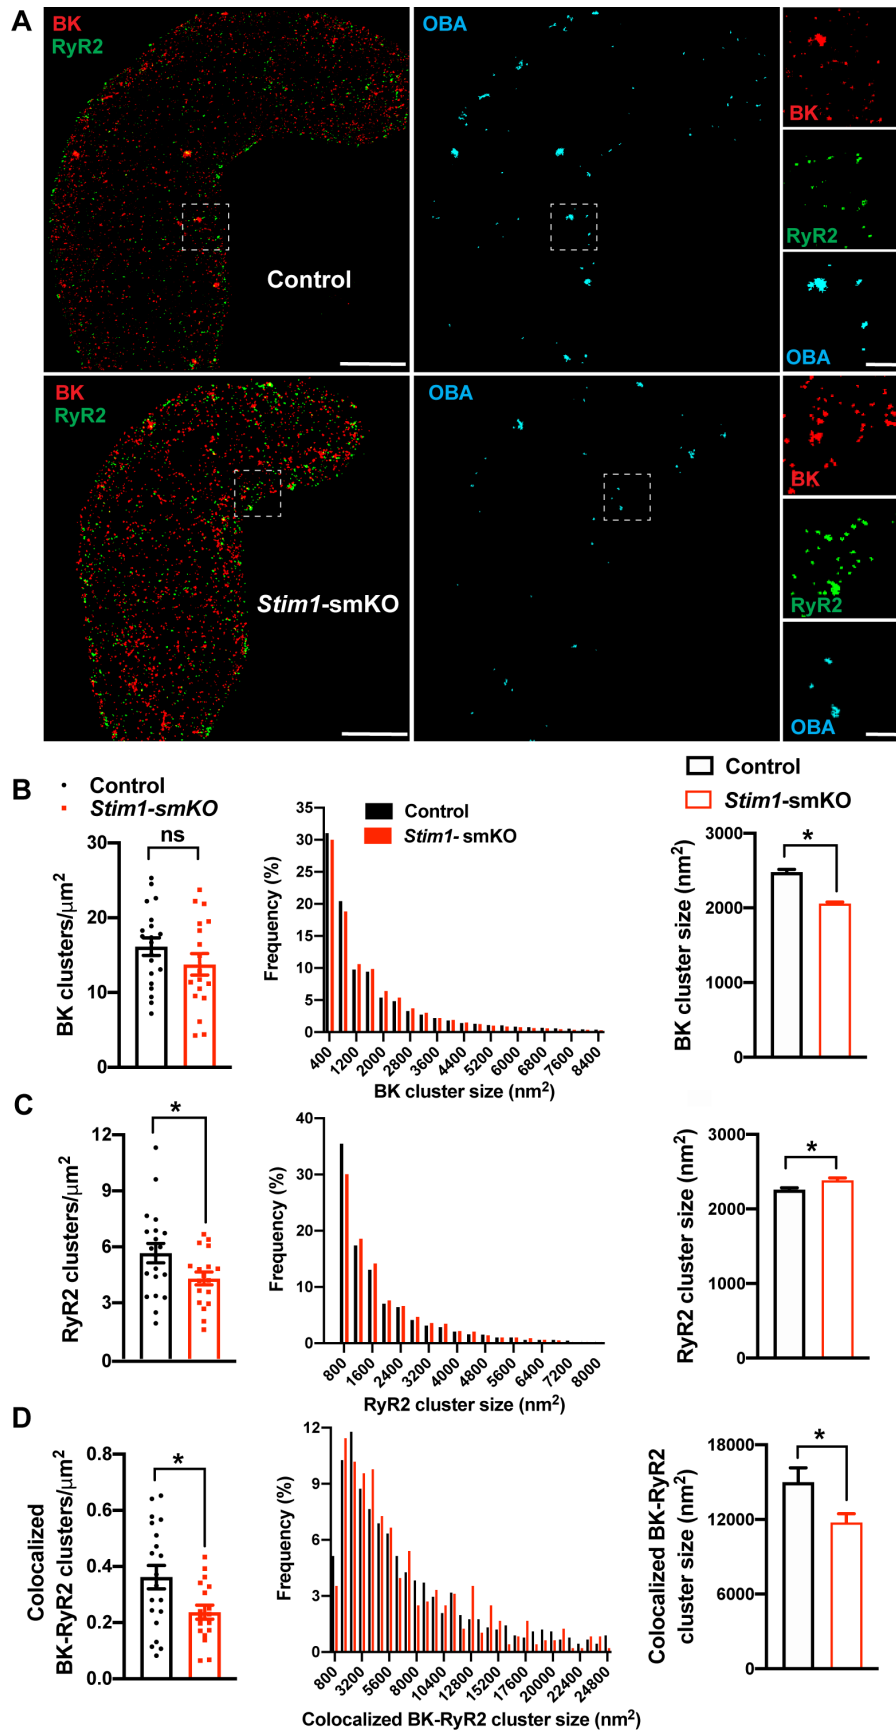

749 **Figure 3: *Stim1* knockout decreases colocalization of BK and RyR2 protein**  
750 **clusters.**

751 **(A)** Superresolution localization maps of freshly isolated cerebral artery SMCs from  
752 control and *Stim1*-smKO mice immunolabeled for BK (red) and RyR2 (green).  
753 Colocalized BK and RyR2 clusters were identified by object-based analysis (OBA) and  
754 mapped (cyan). Scale bar: 3  $\mu$ m. Panels to the right show enlarged areas of the original  
755 superresolution maps indicated by the white boxes. Scale bar: 500 nm. **(B)** Summary  
756 data showing the density (clusters per unit area), frequency distribution of sizes, and  
757 mean size of BK channel clusters. **(C)** Summary data showing the density, frequency  
758 distribution of sizes, and mean size of RyR2 clusters. **(D)** Summary data showing the  
759 density, frequency distribution of sizes, and mean size of colocalizing BK and RyR2  
760 clusters, identified using object-based analysis. For density data, n = 20 cells from 3  
761 mice for controls and n = 18 cells from 3 mice for *Stim1*-smKO mice. For frequency  
762 distribution and mean cluster size data: control, n = 44,340 BK channel clusters, n =  
763 15,193 RyR2 clusters, and n = 1054 colocalizing clusters; *Stim1*-smKO: n = 30,552 BK  
764 channel clusters, n = 9702 RyR2 clusters, and n = 547 colocalizing clusters (\*P < 0.05,  
765 unpaired t-test). ns, not significant.

766

767

768

769

770

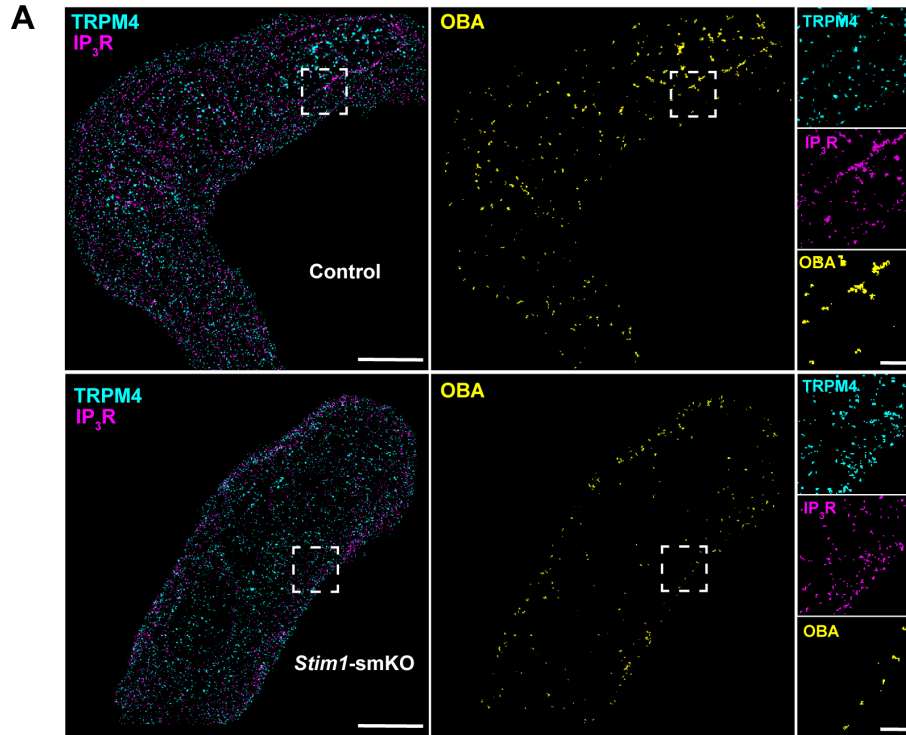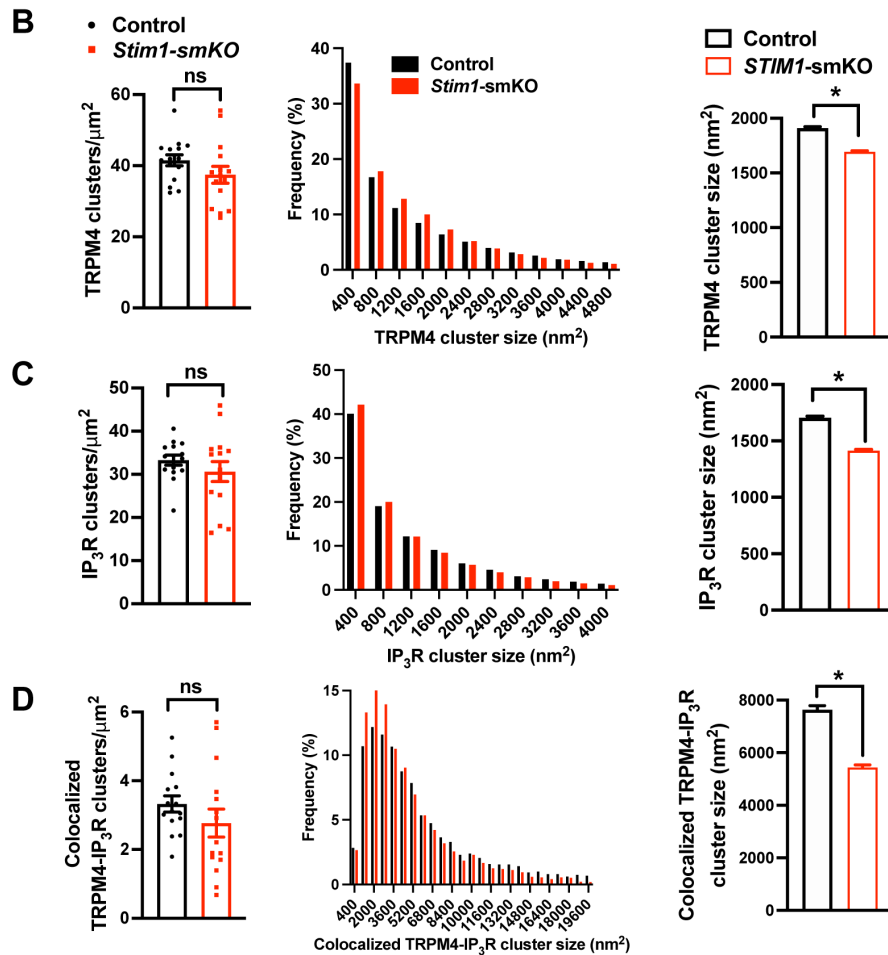

772 **Figure 4: *Stim1* knockout decreases colocalization of TRPM4 and IP<sub>3</sub>R protein**  
773 **clusters.**

774 **(A)** Superresolution localization maps of freshly isolated cerebral artery SMCs from  
775 control and *Stim1*-smKO mice immunolabeled for TRPM4 (cyan) and IP<sub>3</sub>R (magenta).  
776 Colocalized TRPM4 and IP<sub>3</sub>R clusters were identified by object-based analysis (OBA)  
777 and mapped (yellow). Scale bar: 3 μm. Panels to the right show enlarged areas of the  
778 original superresolution maps indicated by white boxes. Scale bar: 500 nm. **(B)**  
779 Summary data showing the density (clusters per unit area), frequency distribution of  
780 sizes, and mean size of TRPM4 channel protein clusters. **(C)** Summary data showing  
781 the density, frequency distribution of sizes, and mean size of IP<sub>3</sub>R clusters. **(D)**  
782 Summary data showing the density, frequency distribution of sizes, and mean size of  
783 colocalizing TRPM4 and IP<sub>3</sub>R clusters, identified using object-based analysis. For  
784 density data, n = 15 cells from 3 mice for both control and *Stim1*-smKO mice. For  
785 frequency distribution and mean cluster size data: control, n = 64292 TRPM4 channel  
786 clusters, n = 51728 IP<sub>3</sub>R clusters, and n = 5164 colocalizing clusters; *Stim1*-smKO mice,  
787 n = 56771 TRPM4 channel clusters, n = 45717 IP<sub>3</sub>R, and n = 3981 colocalizing clusters  
788 (\*P<0.05, unpaired t-test). ns, not significant.

789

790

791

792

793

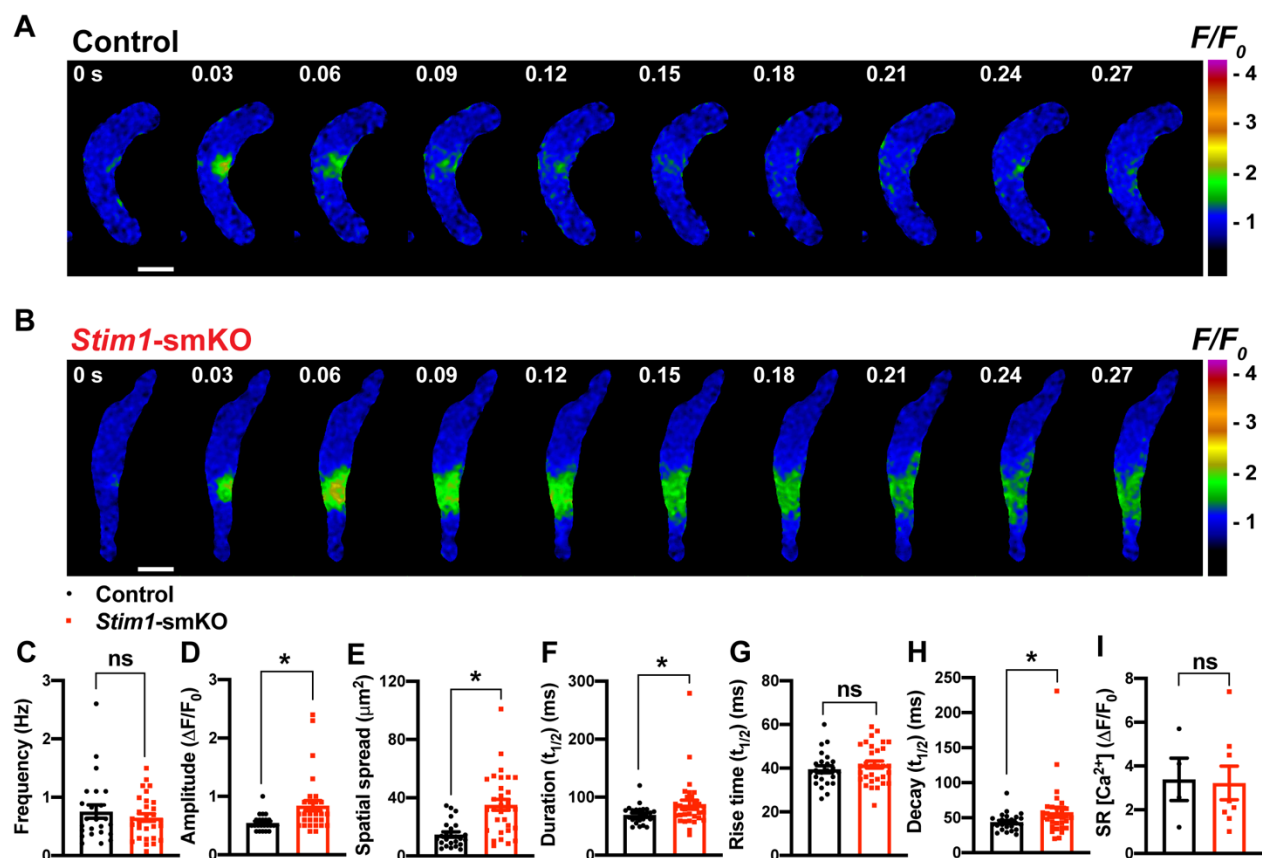

794

795 **Figure 5: *Stim1* knockout alters  $\text{Ca}^{2+}$  spark properties.**

796 **(A and B)** Representative time-course images of cerebral artery SMCs isolated from a  
 797 control **(A)** or *Stim1-smKO* **(B)** mouse exhibiting  $\text{Ca}^{2+}$  spark events, presented as  
 798 changes in fractional fluorescence ( $F/F_0$ ). The elapsed time of the event is shown in  
 799 seconds (s). Scale bar: 10  $\mu\text{m}$ . **(C–H)** Summary data showing  $\text{Ca}^{2+}$  spark frequency **(C)**,  
 800 amplitude **(D)**, spatial spread **(E)**, event duration **(F)**, rise time **(G)**, and decay time **(H)** in  
 801 VSMCs isolated from control and *Stim1-smKO* mice (control, n = 24 spark sites in 12  
 802 cells from 2 mice; *Stim1-smKO*, n = 31 spark sites in 12 cells from 2 mice; \*P < 0.05,  
 803 unpaired t-test). ns, not significant. **(I)** Summary data showing caffeine (10 mM)-evoked  
 804 changes in global  $\text{Ca}^{2+}$  in cerebral artery SMCs isolated from control and *Stim1-smKO*

805 mice. (control, n = 4 cells from 2 mice; *Stim1*-smKO, n = 8 cells from 2 mice, unpaired t-  
806 test). ns, not significant.

807

808

809

810

811

812

813

814

815

816

817

818

819

820

821

822

823



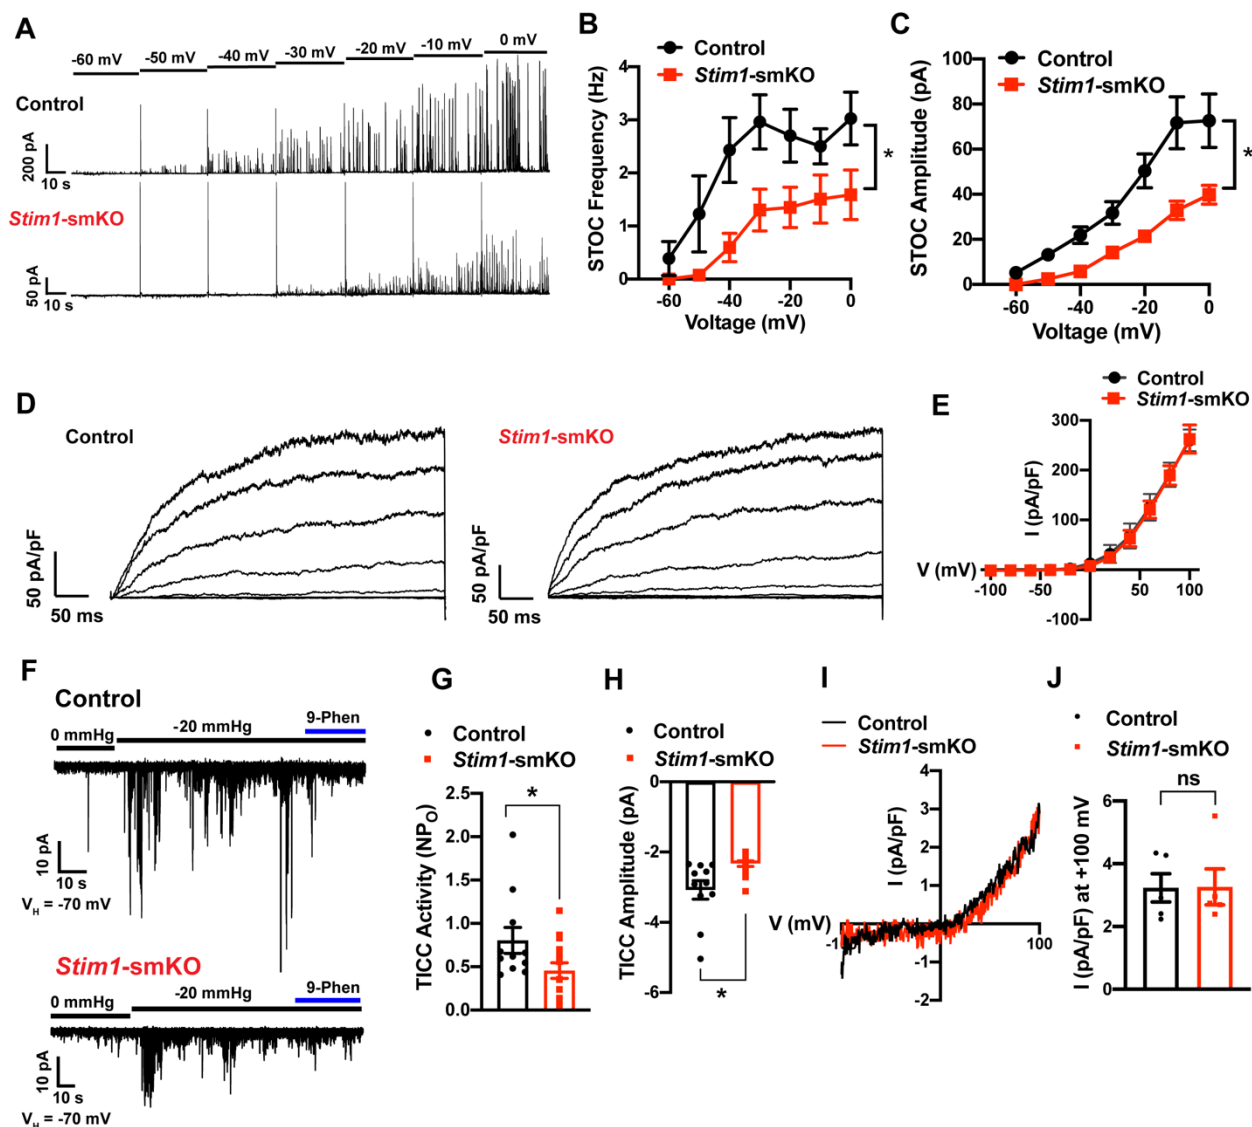

824

825 **Figure 6: *Stim1* knockout diminishes physiological BK and TRPM4 channel**  
 826 **activity.**

827 **(A)** Representative traces of STOCs in cerebral artery SMCs from control and *Stim1*-  
 828 smKO mice, recorded by patch-clamping in the perforated-patch configuration over a  
 829 range of membrane potentials (-60 to 0 mV). **(B and C)** Summary data showing STOC  
 830 frequency **(B)** and amplitude **(C)** (control, n = 13 cells from 4 animals; *Stim1*-smKO, n =

831 17 cells from 5 mice; \*P < 0.05, two-way ANOVA). **(D)** Representative traces of paxilline  
832 (1  $\mu$ M)-sensitive BK currents in cerebral artery SMCs from control and *Stim1*-smKO  
833 mice, recorded by patch-clamping in conventional whole-cell mode during a series of  
834 command voltage steps (-100 to +100 mV). **(E)** Summary data for whole-cell BK  
835 currents (control, n = 6 cells from 3 mice; *Stim1*-smKO, n = 7 cells from 3 mice; two-way  
836 ANOVA). **(F)** Representative traces of TRPM4 currents in cerebral artery SMCs from  
837 control and *Stim1*-smKO mice voltage-clamped at -70 mV, recorded by patch-clamping  
838 in the perforated-patch configuration. TRPM4 currents were evoked as TICC by  
839 application of negative pressure (-20 mmHg) through the patch pipette and were  
840 blocked by bath-application of 9-phenanthrol (9-phen; 30  $\mu$ M). **(G)** Summary data  
841 showing TICC activity as TRPM4 channel open probability ( $NP_o$ ) and **(H)** TICC  
842 amplitude in control (n = 12 cells from 5 mice) and *Stim1*-smKO (n = 15 cells from 5  
843 mice) mice (\*P < 0.05, unpaired t-test). **(I)** Representative conventional whole-cell  
844 patch-clamp recordings of 9-phenanthrol-sensitive TRPM4 currents in cerebral artery  
845 SMCs from control and *Stim1*-smKO mice. Currents were activated by free  $Ca^{2+}$  (200  
846  $\mu$ M), included in the patch pipette solution, and were recorded using a ramp protocol  
847 from -100 to 100 mV from a holding potential of -60 mV. **(J)** Summary of whole-cell  
848 TRPM4 current density at +100 mV (control, n = 5 cells from 3 mice; *Stim1*-smKO, n = 5  
849 cells from 3 mice, unpaired t-test). ns, not significant.

850

851

852

## Cerebral Arteries

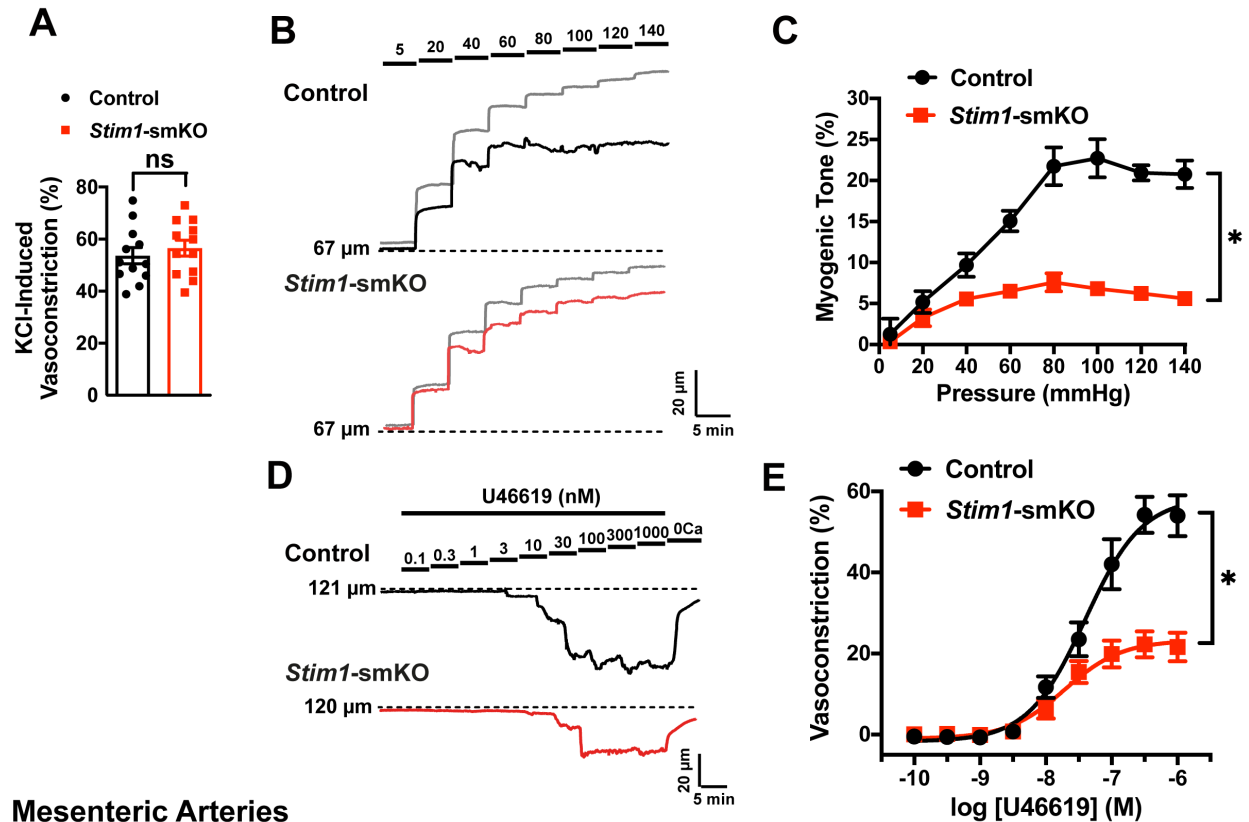

## Mesenteric Arteries

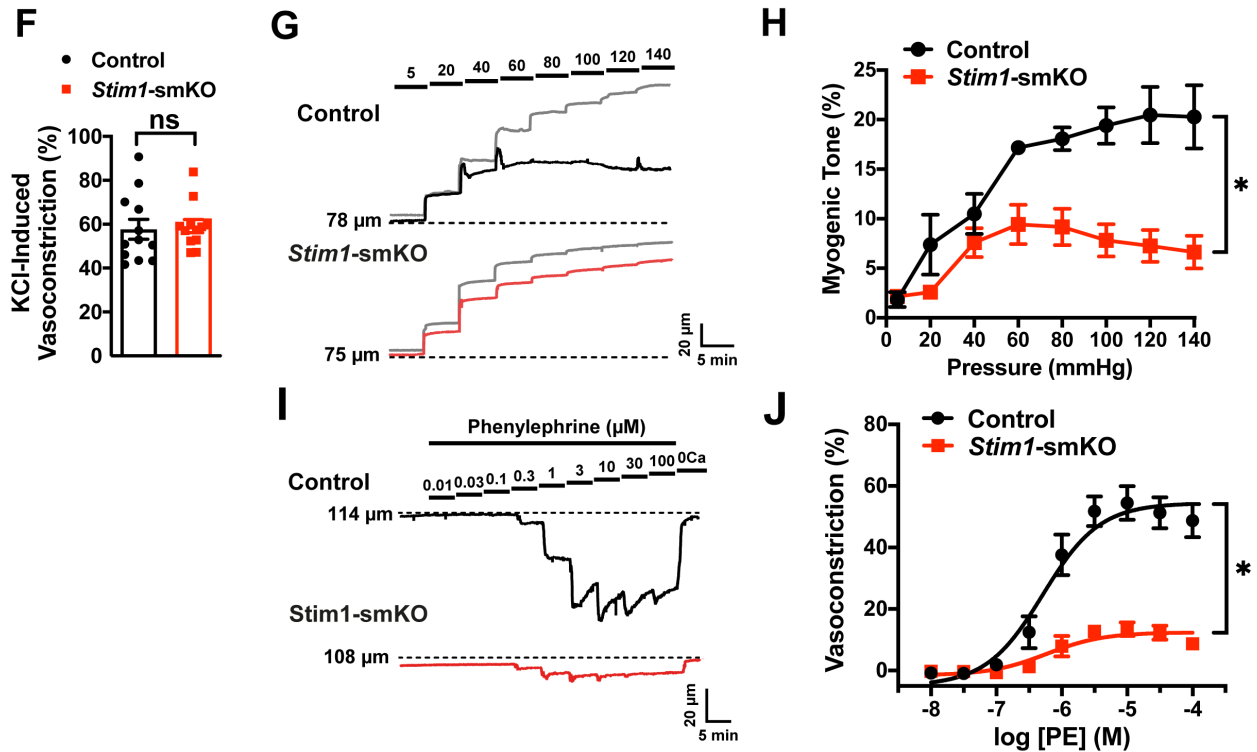

854 **Figure 7: Resistance arteries from *Stim1*-smKO mice are dysfunctional.**

855 **(A)** Summary data showing vasoconstrictor responses to 60 mM KCl in cerebral pial  
856 arteries isolated from control and *Stim1*-smKO mice (n = 12 vessels from 6 mice for  
857 both groups, unpaired t-test). ns, not significant. **(B)** Representative traces showing  
858 changes in luminal diameter over a range of intraluminal pressures (5 to 140 mmHg) in  
859 cerebral pial arteries isolated from control (black trace) and *Stim1*-smKO (red) mice.  
860 Gray traces represent passive responses to changes in intraluminal pressure for each  
861 artery. **(C)** Summary data showing myogenic reactivity as a function of intraluminal  
862 pressure (n = 6 vessels from 3 mice for each group; \*P < 0.05, two-way ANOVA). **(D)**  
863 Representative traces showing changes in luminal diameter in response to a range of  
864 concentrations (0.1 to 1000 nM) of the vasoconstrictor agonist U46619 in cerebral  
865 arteries isolated from control (black trace) and *Stim1*-smKO (red trace) mice. **(E)**  
866 Summary data showing vasoconstriction as a function of U46619 concentration (n = 6  
867 vessels from 3 mice for each group; \*P < 0.05, two-way ANOVA). **(F)** Summary data  
868 showing vasoconstrictor responses to 60 mM KCl in 3<sup>rd</sup>-order mesenteric arteries  
869 isolated from control and *Stim1*-smKO mice (n = 12 vessels from 6 mice for both  
870 groups, unpaired t-test). ns, not significant **(G)** Representative traces showing changes  
871 in luminal diameter over a range of intraluminal pressures (5 to 140 mmHg) in 3<sup>rd</sup>-order  
872 mesenteric arteries isolated from control (black trace) and *Stim1*-smKO (red) mice. Gray  
873 traces represent passive responses to changes in intraluminal pressure for each artery.  
874 **(H)** Summary data for myogenic reactivity as a function of intraluminal pressure (n = 6  
875 vessels from 3 mice for each group, 2-way ANOVA, \*P < 0.05). **(I)** Representative  
876 traces showing changes in luminal diameter in response to a range of concentrations

877 (0.01 to 100  $\mu$ M) of the vasoconstrictor agonist phenylephrine (PE) in 3<sup>rd</sup>-order  
878 mesenteric arteries isolated from control (black trace) and *Stim1*-smKO (red trace)  
879 mice. **(J)** Summary data for vasoconstriction as a function of PE concentration,  
880 presented as means  $\pm$  SEM (n = 6 vessels from 3 mice for each group; \*P < 0.05, two-  
881 way ANOVA).

882

883

884

885

886

887

888

889

890

891

892

893

894

895

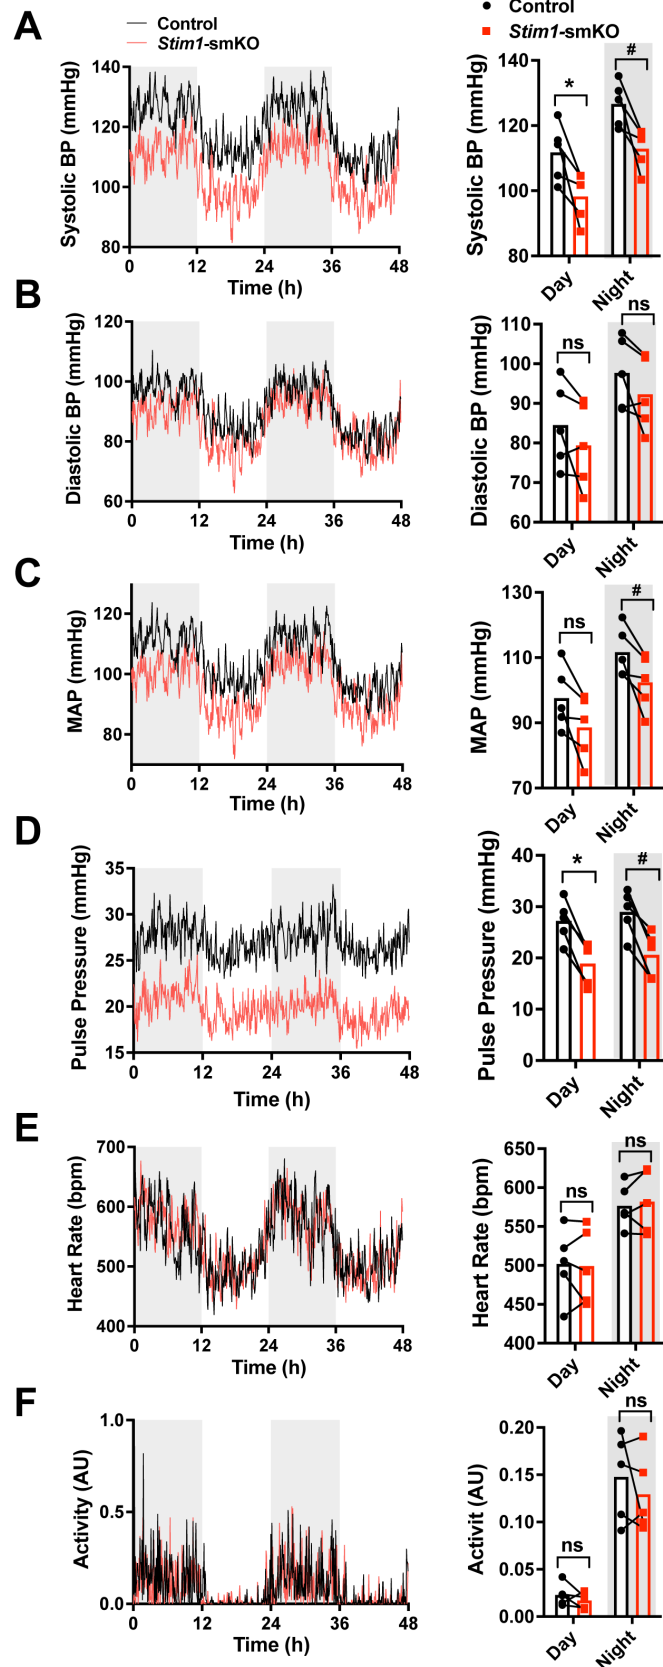

897 **Figure 8. *Stim1*-smKO mice are hypotensive.**

898 **(A)** Systolic BP (mmHg) over 48 hours in conscious, radio telemeter-implanted *Stim1*-  
899 smKO mice before (control) and after (*Stim1*-smKO) tamoxifen injection. Shaded  
900 regions depict night cycles (n = 5 for both groups; \*P < 0.05 vs. control day, #P < 0.05  
901 vs. control night, paired t-test). **(B)** Diastolic BP measurements for *Stim1*-smKO mice  
902 before and after tamoxifen injection (n = 5 for both groups, paired t-test). ns, not  
903 significant. **(C)** MAP for *Stim1*-smKO mice before and after tamoxifen injection (n = 5 for  
904 both groups, #P < 0.05 vs. control night, paired t-test) ns, not significant. **(D)** Pulse  
905 pressure for *Stim1*-smKO mice before and after tamoxifen injection (n = 5 for both  
906 groups; \*P < 0.05 vs. control day, #P < 0.05 vs. control night, paired t-test). **(E)** HR for  
907 *Stim1*-smKO mice before and after tamoxifen injection (n = 5 for both groups, paired t-  
908 test) ns, not significant. **(F)** Locomotor activity (arbitrary units [AU]) for *Stim1*-smKO  
909 mice before and after tamoxifen injection (n = 5 for both groups, paired t-test) ns, not  
910 significant. Forty-eight-hour recordings are shown as means; bar graphs are shown as  
911 means ± SEM.

912

913

914

915

916

917

918 **Supplementary Figures**

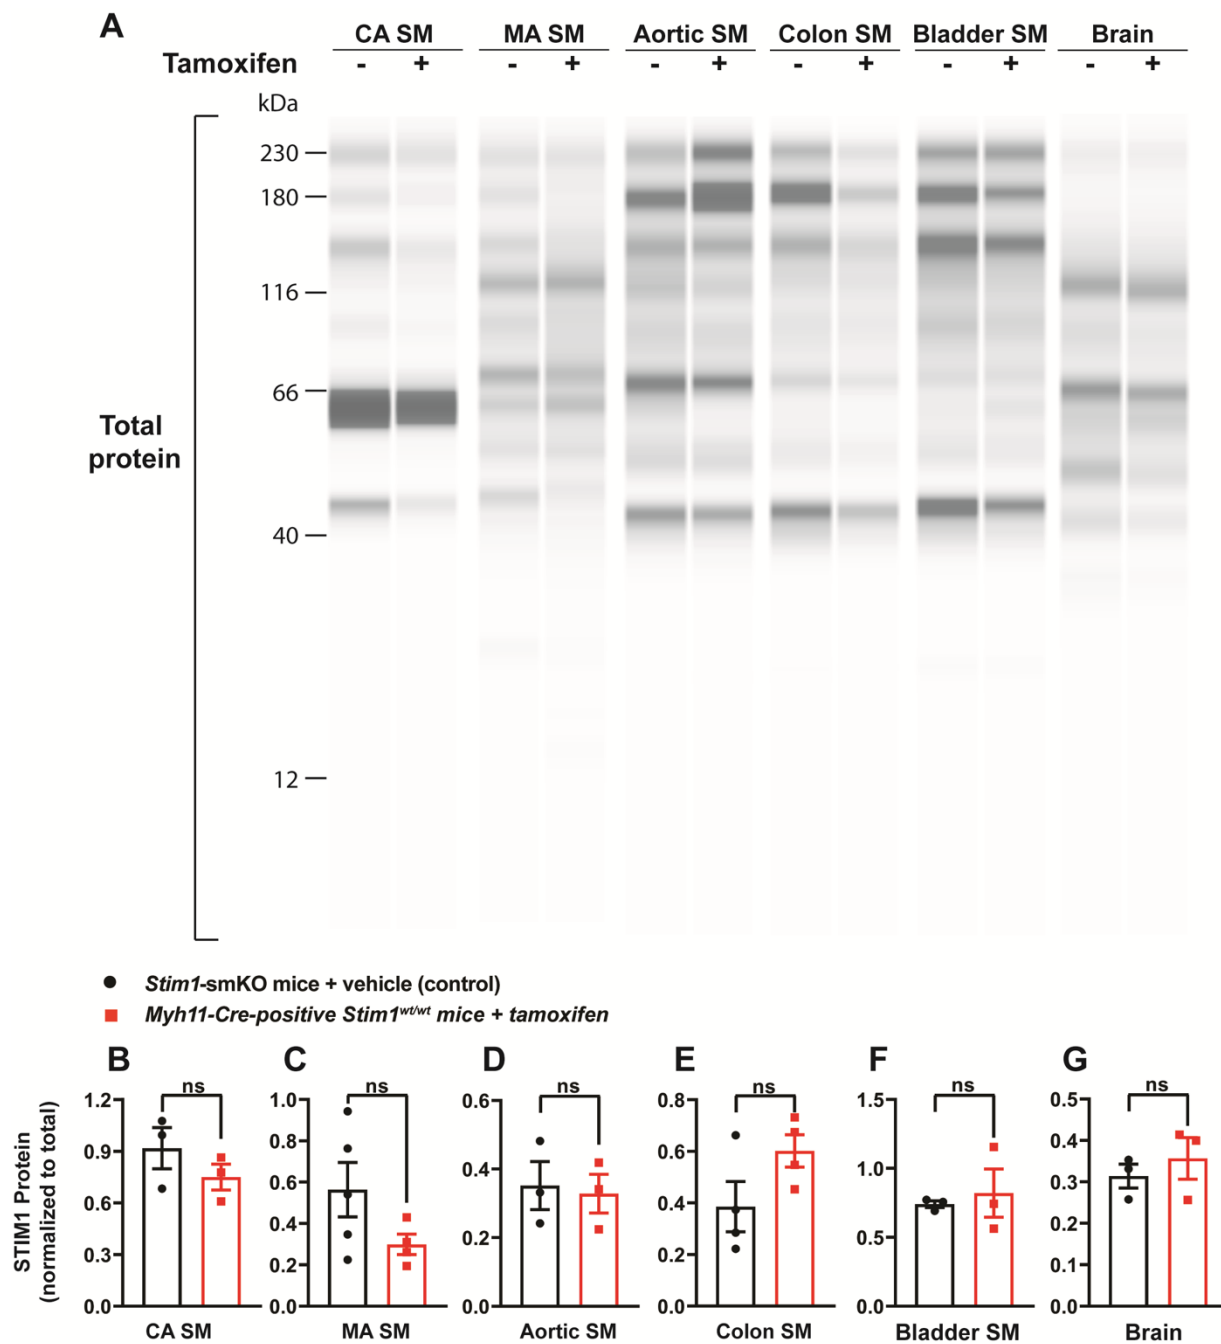

919

920 **Supplementary figure 1:**

921 **(A)** Representative Wes blot showing total protein levels in cerebral artery smooth  
 922 muscle (CA SM), mesenteric artery smooth muscle (MA SM), aortic smooth muscle,



923 colonic smooth muscle, bladder smooth muscle, and whole-brain tissues isolated from  
924 vehicle- and tamoxifen-injected *Stim1*-smKO mice. **(B–G)** Summary data showing  
925 STIM1 protein expression normalized to total protein levels in cerebral artery smooth  
926 muscle **(B)**, mesenteric artery smooth muscle **(C)**, aortic smooth muscle **(D)**, colonic  
927 smooth muscle **(E)**, bladder smooth muscle **(F)**, and brain **(G)** tissues isolated from  
928 vehicle-injected *Stim1*-smKO mice (control) and tamoxifen-injected *Stim1*-smKO mice  
929 (n = 3–5 mice/group, unpaired t-test) ns, not significant.

930

931

932

933

934

935

936

937

938

939

940

941

942

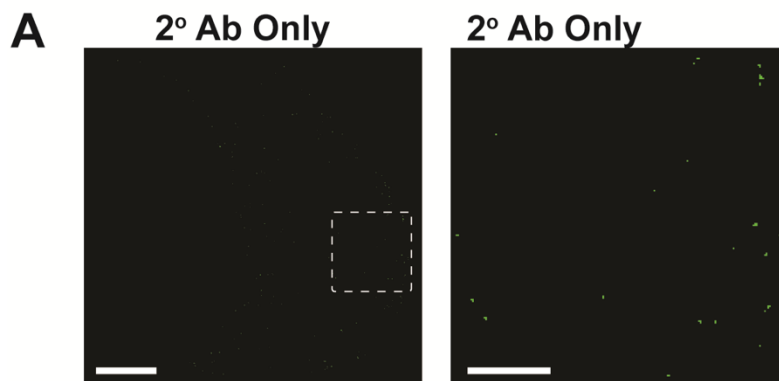

- B**
- Vehicle-treated *Stim1*-smKO mice (control)
  - Tamoxifen-treated *Stim1*-smKO mice
  - ▲ 2° Ab only, control mouse

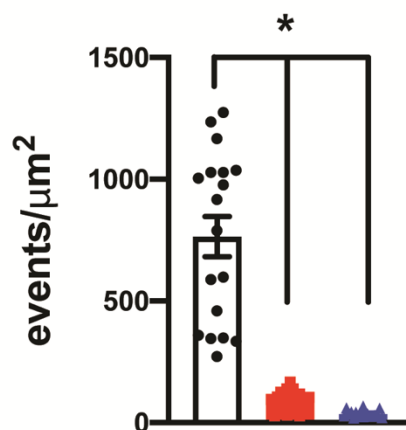

943

944 **Supplementary figure 2:**

945 **(A)** Representative superresolution localization maps of an isolated cerebral artery SMC  
946 from a vehicle-injected (control) *Stim1*-smKO mouse immunolabeled with only the  
947 secondary antibody (2° Ab) used to detect STIM1 (goat anti-rabbit Alexa Fluor 647) and  
948 imaged with GSDIM. Right panel: enlarged image of the area highlighted by the white  
949 square in the left panel. Scale bars: 3 μm (left panel) and 1 μm (right panel). **(B)** GSDIM  
950 events detected per unit area in cerebral artery SMCs isolated from vehicle- and

951 tamoxifen-injected *Stim1*-smKO mice immunolabeled with anti-STIM1 antibody and  
952 cells isolated from vehicle-injected *Stim1*-smKO mice immunolabeled only with the  
953 secondary antibody (negative control). Data are presented as means  $\pm$  SEM (n = 18  
954 cells from 3 mice in each group; \*P < 0.05 vs. control, one-way ANOVA).

955

956

957

958

959

960

961

962

963

964

965

966

967

968

969

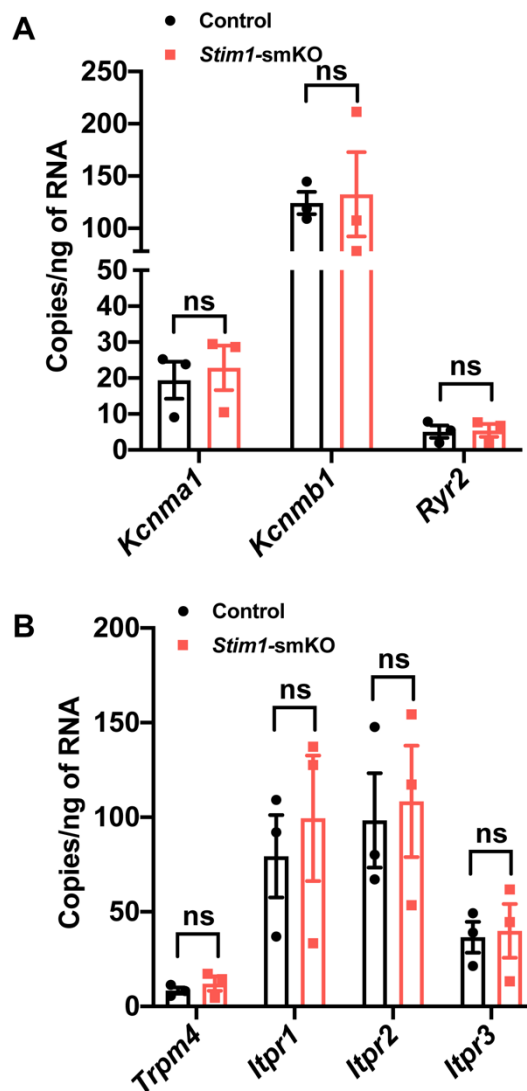

970

971 **Supplementary figure 3:**

972 **(A)** mRNA expression levels (transcript copies/ng of RNA) of *Kcnma1* (BK $\alpha$ 1), *Kcnmb1*

973 (BK $\beta$ 1), and *Ryr2* (RyR2) in cerebral arteries from control and *Stim1*-smKO mice,

974 determined by quantitative droplet digital PCR (ddPCR). **(B)** mRNA expression levels of

975 *Trpm4* (TRPM4), *Itpr1* (IP $_3$ R1), *Itpr2* (IP $_3$ R2), and *Itpr3* (IP $_3$ R3) in cerebral arteries from

976 control and *Stim1*-smKO mice. Data are presented as means  $\pm$  SEM ( $n = 3$  mice in

977 each group, unpaired t-test). ns, not significant.

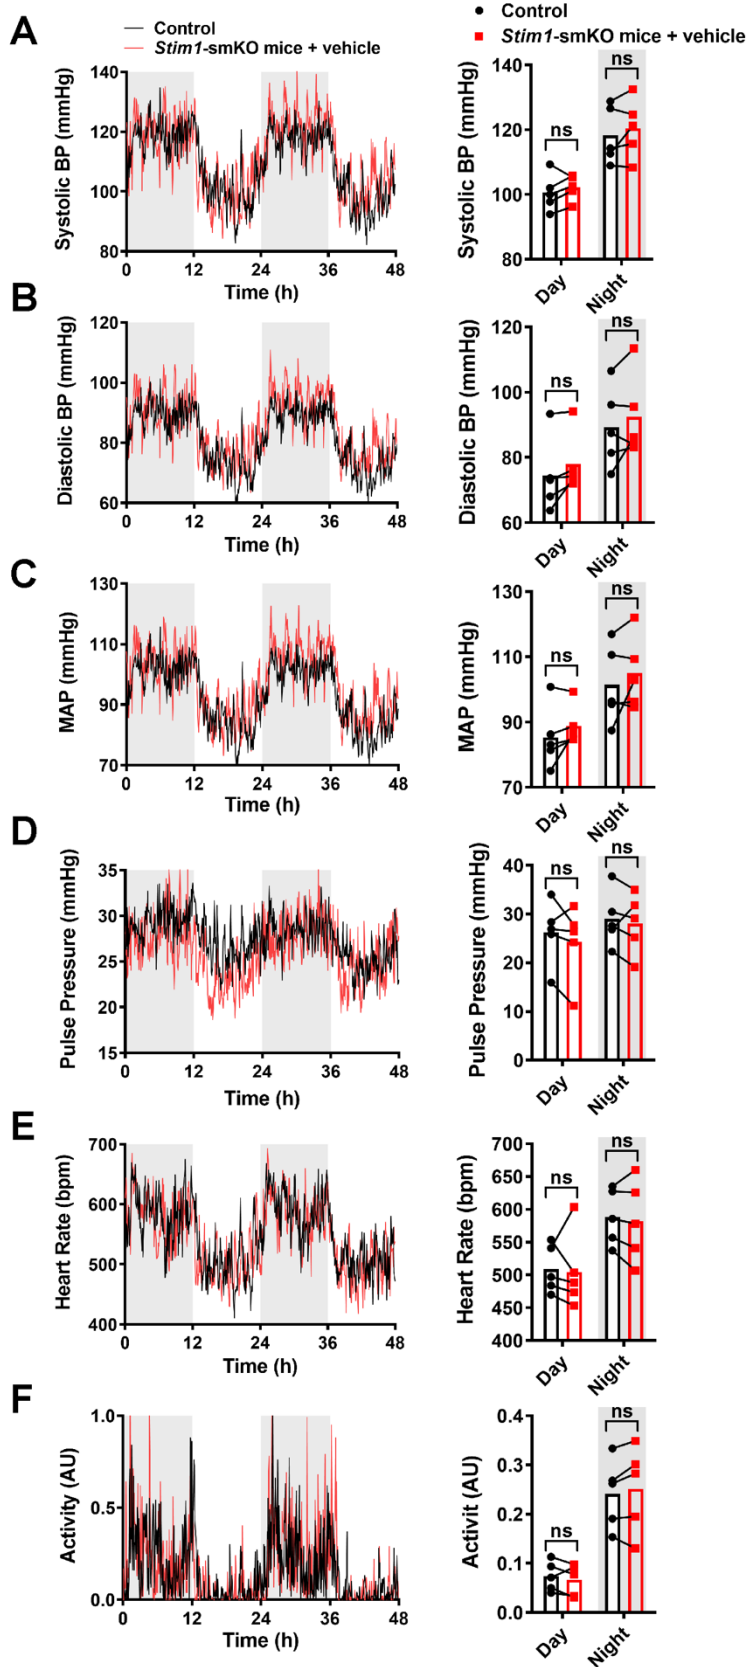

979 **Supplementary figure 4:**

980 **(A)** Systolic BP (mmHg) over 48 hours in conscious, radio telemeter-implanted *Stim1-*  
981 *smKO* mice before (control) and after vehicle injection. Shaded regions depict night  
982 cycles (n = 5 for both groups). **(B)** Diastolic BP measurements for *Stim1-smKO* mice  
983 before and after vehicle injection (n = 5 for both groups). **(C)** MAP for *Stim1-smKO* mice  
984 before and after vehicle injection (n = 5 for both groups). **(D)** Pulse pressure for *Stim1-*  
985 *smKO* mice before and after vehicle injection (n = 5 for both groups). **(E)** HR for *Stim1-*  
986 *smKO* mice before and after vehicle injection (n = 5 for both groups). **(F)** Locomotor  
987 activity (arbitrary units [AU]) for *Stim1-smKO* mice before and after vehicle injection  
988 (n = 5 for both groups). Forty-eight-hour recordings are shown as means; bar graphs  
989 are shown as means  $\pm$  SEM. There were no significant differences.

990

991

992 **Supplementary Table**

| Gene Name     | Forward (5' to 3')     | Reverse (5' to 3')     | Accession number |
|---------------|------------------------|------------------------|------------------|
| <i>Kcnma1</i> | GCTTAAGCTCCTGATGATAGCC | AAGGTGGTTCCTCAGGGTTAA  | NM_001253358.1   |
| <i>Kcnmb1</i> | ACCAACAGTGCTCCTATATCCC | ACGCTGGTCTCGTTGACTTG   | NM_031169.4      |
| <i>Ryr2</i>   | TGGAGGACATGCATCCAACA   | TCCTATGCCTGACAAGAACTCC | NM_023868.2      |
| <i>Trpm4</i>  | TTCACGTA CTCTGGCCGAAA  | CGGGTAACGAGACTGTACACA  | NM_175130.4      |
| <i>Itpr1</i>  | AACGTGGGCCACAACATCTA   | CCAGGTTTCAGCATGGTTTGAA | NM_010585.4      |
| <i>Itpr2</i>  | CCTCAAGACAACCTGCTTCA   | TGATGTGCTCCTCAAAGGAC   | NM_010586.1      |
| <i>Itpr3</i>  | GCAGCGAGAAGCAGAAGAAA   | GTTGTCAA ACTTGTCCTCTCC | NM_080553.3      |

993

994 **Table S1** – Forward and reverse primer sequences used for ddPCR experiments.

995

996

997

998

999

1000

1001

1002

1003

1004

1005

1006

1007 **Supplementary Movie Legends**

1008 ***Supplementary movie 1:***

1009 PM-SR interactions in a cerebral artery SMC isolated from a control mouse. Animated  
1010 representation of a SIM image series that was reconstructed and rendered in 3D. The  
1011 PM is shown in red and made transparent for better visualization; the SR is shown in  
1012 green; and colocalized areas are shown in yellow.

1013 ***Supplementary movie 2:***

1014 PM-SR interactions in a cerebral artery SMC isolated from a tamoxifen-injected *Stim1-*  
1015 *smKO* mouse. Animated representation of a SIM image series that was reconstructed  
1016 and rendered in 3D. The PM is shown in red and made transparent for better  
1017 visualization; the SR is shown in green; and areas of colocalization are shown in yellow.

1018 ***Supplementary movie 3:***

1019 Representative movie showing spontaneous Ca<sup>2+</sup> sparks in a cerebral artery SMC  
1020 isolated from a control mouse.

1021 ***Supplementary movie 4:***

1022 Representative movie showing spontaneous Ca<sup>2+</sup> sparks in a cerebral artery SMC  
1023 isolated from a *Stim1-smKO* mouse.

1024

1025

1026

1027



## Literature Cited

- 1028  
1029  
1030 1. Nelson MT, Cheng H, Rubart M, Santana LF, Bonev AD, Knot HJ, et al. Relaxation  
1031 of arterial smooth muscle by calcium sparks. *Science*. 1995;270(5236):633-7.  
1032 2. Gonzales AL, Yang Y, Sullivan MN, Sanders L, Dabertrand F, Hill-Eubanks DC, et  
1033 al. A PLCgamma1-dependent, force-sensitive signaling network in the myogenic  
1034 constriction of cerebral arteries. *Sci Signal*. 2014;7(327):ra49.  
1035 3. Mironneau J, Arnaudeau S, Macrez-Lepretre N, Boittin FX. Ca<sup>2+</sup> sparks and Ca<sup>2+</sup>  
1036 waves activate different Ca(2+)-dependent ion channels in single myocytes from rat portal  
1037 vein. *Cell Calcium*. 1996;20(2):153-60.  
1038 4. ZhuGe R, Tuft RA, Fogarty KE, Bellve K, Fay FS, Walsh JV, Jr. The influence of  
1039 sarcoplasmic reticulum Ca<sup>2+</sup> concentration on Ca<sup>2+</sup> sparks and spontaneous transient  
1040 outward currents in single smooth muscle cells. *J Gen Physiol*. 1999;113(2):215-28.  
1041 5. Gonzales AL, Amberg GC, Earley S. Ca<sup>2+</sup> release from the sarcoplasmic  
1042 reticulum is required for sustained TRPM4 activity in cerebral artery smooth muscle cells.  
1043 *Am J Physiol Cell Physiol*. 2010;299(2):C279-C88.  
1044 6. Zhuge R, Fogarty KE, Tuft RA, Walsh JV, Jr. Spontaneous transient outward  
1045 currents arise from microdomains where BK channels are exposed to a mean Ca(2+)  
1046 concentration on the order of 10 microM during a Ca(2+) spark. *J Gen Physiol*.  
1047 2002;120(1):15-27.  
1048 7. Chang CL, Chen YJ, Liou J. ER-plasma membrane junctions: Why and how do we  
1049 study them? *Biochim Biophys Acta Mol Cell Res*. 2017;1864(9):1494-506.  
1050 8. Chen YJ, Quintanilla CG, Liou J. Recent insights into mammalian ER-PM  
1051 junctions. *Curr Opin Cell Biol*. 2019;57:99-105.  
1052 9. Michaelis M, Nieswandt B, Stegner D, Eilers J, Kraft R. STIM1, STIM2, and Orai1  
1053 regulate store-operated calcium entry and purinergic activation of microglia. *Glia*.  
1054 2015;63(4):652-63.  
1055 10. Mercer JC, Dehaven WI, Smyth JT, Wedel B, Boyles RR, Bird GS, et al. Large  
1056 store-operated calcium selective currents due to co-expression of Orai1 or Orai2 with the  
1057 intracellular calcium sensor, Stim1. *J Biol Chem*. 2006;281(34):24979-90.  
1058 11. Kwon J, An H, Sa M, Won J, Shin JI, Lee CJ. Orai1 and Orai3 in Combination with  
1059 Stim1 Mediate the Majority of Store-operated Calcium Entry in Astrocytes. *Exp Neurobiol*.  
1060 2017;26(1):42-54.  
1061 12. Abdullaev IF, Bisailon JM, Potier M, Gonzalez JC, Motiani RK, Trebak M. Stim1  
1062 and Orai1 mediate CRAC currents and store-operated calcium entry important for  
1063 endothelial cell proliferation. *Circ Res*. 2008;103(11):1289-99.  
1064 13. Berry PA, Birnie R, Droop AP, Maitland NJ, Collins AT. The calcium sensor STIM1  
1065 is regulated by androgens in prostate stromal cells. *Prostate*. 2011;71(15):1646-55.  
1066 14. Chin-Smith EC, Slater DM, Johnson MR, Tribe RM. STIM and Orai isoform  
1067 expression in pregnant human myometrium: a potential role in calcium signaling during  
1068 pregnancy. *Front Physiol*. 2014;5:169.  
1069 15. Correll RN, Goonasekera SA, van Berlo JH, Burr AR, Accornero F, Zhang H, et al.  
1070 STIM1 elevation in the heart results in aberrant Ca(2)(+) handling and cardiomyopathy. *J*  
1071 *Mol Cell Cardiol*. 2015;87:38-47.

- 1072 16. Jones BF, Boyles RR, Hwang SY, Bird GS, Putney JW. Calcium influx  
1073 mechanisms underlying calcium oscillations in rat hepatocytes. *Hepatology*.  
1074 2008;48(4):1273-81.
- 1075 17. Klejman ME, Gruszczynska-Biegala J, Skibinska-Kijek A, Wisniewska MB, Misztal  
1076 K, Blazejczyk M, et al. Expression of STIM1 in brain and puncta-like co-localization of  
1077 STIM1 and ORAI1 upon depletion of Ca(2+) store in neurons. *Neurochem Int*.  
1078 2009;54(1):49-55.
- 1079 18. Koh S, Lee K, Wang C, Cabot RA, Machaty Z. STIM1 regulates store-operated  
1080 Ca<sup>2+</sup> entry in oocytes. *Dev Biol*. 2009;330(2):368-76.
- 1081 19. Lopez JJ, Jardin I, Bobe R, Pariente JA, Enouf J, Salido GM, et al. STIM1 regulates  
1082 acidic Ca<sup>2+</sup> store refilling by interaction with SERCA3 in human platelets. *Biochem*  
1083 *Pharmacol*. 2008;75(11):2157-64.
- 1084 20. Lu M, Branstrom R, Berglund E, Hoog A, Bjorklund P, Westin G, et al. Expression  
1085 and association of TRPC subtypes with Orai1 and STIM1 in human parathyroid. *J Mol*  
1086 *Endocrinol*. 2010;44(5):285-94.
- 1087 21. Lu W, Wang J, Shimoda LA, Sylvester JT. Differences in STIM1 and TRPC  
1088 expression in proximal and distal pulmonary arterial smooth muscle are associated with  
1089 differences in Ca<sup>2+</sup> responses to hypoxia. *Am J Physiol Lung Cell Mol Physiol*.  
1090 2008;295(1):L104-13.
- 1091 22. Lyfenko AD, Dirksen RT. Differential dependence of store-operated and excitation-  
1092 coupled Ca<sup>2+</sup> entry in skeletal muscle on STIM1 and Orai1. *J Physiol*.  
1093 2008;586(20):4815-24.
- 1094 23. Numaga-Tomita T, Putney JW. Role of STIM1- and Orai1-mediated Ca<sup>2+</sup> entry in  
1095 Ca<sup>2+</sup>-induced epidermal keratinocyte differentiation. *J Cell Sci*. 2013;126(Pt 2):605-12.
- 1096 24. Nurbaeva MK, Eckstein M, Concepcion AR, Smith CE, Srikanth S, Paine ML, et  
1097 al. Dental enamel cells express functional SOCE channels. *Sci Rep*. 2015;5:15803.
- 1098 25. Onodera K, Pouokam E, Diener M. STIM1-regulated Ca<sup>2+</sup> influx across the apical  
1099 and the basolateral membrane in colonic epithelium. *J Membr Biol*. 2013;246(4):271-85.
- 1100 26. Peel SE, Liu B, Hall IP. A key role for STIM1 in store operated calcium channel  
1101 activation in airway smooth muscle. *Respir Res*. 2006;7:119.
- 1102 27. Takahashi Y, Watanabe H, Murakami M, Ono K, Munehisa Y, Koyama T, et al.  
1103 Functional role of stromal interaction molecule 1 (STIM1) in vascular smooth muscle cells.  
1104 *Biochem Biophys Res Commun*. 2007;361(4):934-40.
- 1105 28. Wissenbach U, Philipp SE, Gross SA, Cavalie A, Flockerzi V. Primary structure,  
1106 chromosomal localization and expression in immune cells of the murine ORAI and STIM  
1107 genes. *Cell Calcium*. 2007;42(4-5):439-46.
- 1108 29. Zhang W, Meng H, Li ZH, Shu Z, Ma X, Zhang BX. Regulation of STIM1, store-  
1109 operated Ca<sup>2+</sup> influx, and nitric oxide generation by retinoic acid in rat mesangial cells.  
1110 *Am J Physiol Renal Physiol*. 2007;292(3):F1054-64.
- 1111 30. Zhou Y, Wang X, Loktionova NA, Cai X, Nwokonko RM, Vrana E, et al. STIM1  
1112 dimers undergo unimolecular coupling to activate Orai1 channels. *Nat Commun*.  
1113 2015;6:8395.
- 1114 31. Perni S, Dynes JL, Yeromin AV, Cahalan MD, Franzini-Armstrong C. Nanoscale  
1115 patterning of STIM1 and Orai1 during store-operated Ca<sup>2+</sup> entry. *Proc Natl Acad Sci U S*  
1116 *A*. 2015;112(40):E5533-42.

- 1117 32. Soboloff J, Spassova MA, Tang XD, Hewavitharana T, Xu W, Gill DL. Orai1 and  
1118 STIM reconstitute store-operated calcium channel function. *J Biol Chem.*  
1119 2006;281(30):20661-5.
- 1120 33. Spassova MA, Soboloff J, He LP, Xu W, Dziadek MA, Gill DL. STIM1 has a plasma  
1121 membrane role in the activation of store-operated Ca(2+) channels. *Proc Natl Acad Sci*  
1122 *U S A.* 2006;103(11):4040-5.
- 1123 34. Stathopoulos PB, Schindl R, Fahrner M, Zheng L, Gasmi-Seabrook GM, Muik M, et  
1124 al. STIM1/Orai1 coiled-coil interplay in the regulation of store-operated calcium entry. *Nat*  
1125 *Commun.* 2013;4:2963-.
- 1126 35. Zhou Y, Srinivasan P, Razavi S, Seymour S, Meraner P, Gudlur A, et al. Initial  
1127 activation of STIM1, the regulator of store-operated calcium entry. *Nat Struct Mol Biol.*  
1128 2013;20(8):973-81.
- 1129 36. Bisailon JM, Motiani RK, Gonzalez-Cobos JC, Potier M, Halligan KE, Alzawahra  
1130 WF, et al. Essential role for STIM1/Orai1-mediated calcium influx in PDGF-induced  
1131 smooth muscle migration. *Am J Physiol Cell Physiol.* 2010;298(5):C993-1005.
- 1132 37. Potier M, Gonzalez JC, Motiani RK, Abdullaev IF, Bisailon JM, Singer HA, et al.  
1133 Evidence for STIM1- and Orai1-dependent store-operated calcium influx through ICRAC  
1134 in vascular smooth muscle cells: role in proliferation and migration. *Faseb j.*  
1135 2009;23(8):2425-37.
- 1136 38. Fernandez RA, Wan J, Song S, Smith KA, Gu Y, Tauseef M, et al. Upregulated  
1137 expression of STIM2, TRPC6, and Orai2 contributes to the transition of pulmonary arterial  
1138 smooth muscle cells from a contractile to proliferative phenotype. *Am J Physiol Cell*  
1139 *Physiol.* 2015;308(8):C581-93.
- 1140 39. Collins SR, Meyer T. Evolutionary origins of STIM1 and STIM2 within ancient Ca<sup>2+</sup>  
1141 signaling systems. *Trends Cell Biol.* 2011;21(4):202-11.
- 1142 40. Harraz OF, Altier C. STIM1-mediated bidirectional regulation of Ca(2+) entry  
1143 through voltage-gated calcium channels (VGCC) and calcium-release activated channels  
1144 (CRAC). *Front Cell Neurosci.* 2014;8:43-.
- 1145 41. Worley PF, Zeng W, Huang GN, Yuan JP, Kim JY, Lee MG, et al. TRPC channels  
1146 as STIM1-regulated store-operated channels. *Cell calcium.* 2007;42(2):205-11.
- 1147 42. Mignen O, Thompson JL, Shuttleworth TJ. STIM1 regulates Ca<sup>2+</sup> entry via  
1148 arachidonate-regulated Ca<sup>2+</sup>-selective (ARC) channels without store depletion or  
1149 translocation to the plasma membrane. *J Physiol.* 2007;579(Pt 3):703-15.
- 1150 43. Lee KJ, Hyun C, Woo JS, Park CS, Kim DH, Lee EH. Stromal interaction molecule  
1151 1 (STIM1) regulates sarcoplasmic/endoplasmic reticulum Ca<sup>2+</sup>-ATPase 1a (SERCA1a) in  
1152 skeletal muscle. *Pflugers Archiv : European journal of physiology.* 2014;466(5):987-1001.
- 1153 44. Ritchie MF, Samakai E, Soboloff J. STIM1 is required for attenuation of PMCA-  
1154 mediated Ca<sup>2+</sup> clearance during T-cell activation. *The EMBO journal.* 2012;31(5):1123-  
1155 33.
- 1156 45. Martin AC, Willoughby D, Ciruela A, Ayling LJ, Pagano M, Wachten S, et al.  
1157 Capacitative Ca<sup>2+</sup> entry via Orai1 and stromal interacting molecule 1 (STIM1) regulates  
1158 adenylyl cyclase type 8. *Molecular pharmacology.* 2009;75(4):830-42.
- 1159 46. Motiani RK, Tanwar J, Raja DA, Vashisht A, Khanna S, Sharma S, et al. STIM1  
1160 activation of adenylyl cyclase 6 connects Ca(2+) and cAMP signaling during  
1161 melanogenesis. *The EMBO journal.* 2018;37(5).

- 1162 47. Chappell J, Harman JL, Narasimhan VM, Yu H, Foote K, Simons BD, et al.  
1163 Extensive Proliferation of a Subset of Differentiated, yet Plastic, Medial Vascular Smooth  
1164 Muscle Cells Contributes to Neointimal Formation in Mouse Injury and Atherosclerosis  
1165 Models. *Circ Res*. 2016;119(12):1313-23.
- 1166 48. Wirth A, Benyo Z, Lukasova M, Leutgeb B, Wettschureck N, Gorbey S, et al. G12-  
1167 G13-LARG-mediated signaling in vascular smooth muscle is required for salt-induced  
1168 hypertension. *Nat Med*. 2008;14(1):64-8.
- 1169 49. Pritchard HAT, Griffin CS, Yamasaki E, Thakore P, Lane C, Greenstein AS, et al.  
1170 Nanoscale coupling of junctophilin-2 and ryanodine receptors regulates vascular smooth  
1171 muscle cell contractility. *Proceedings of the National Academy of Sciences of the United  
1172 States of America*. 2019;116(43):21874-81.
- 1173 50. Griffin CS, Alvarado MG, Yamasaki E, Drumm BT, Krishnan V, Ali S, et al. The  
1174 intracellular Ca(2+) release channel TRPML1 regulates lower urinary tract smooth muscle  
1175 contractility. *Proc Natl Acad Sci U S A*. 2020;117(48):30775-86.
- 1176 51. Thakore P, Pritchard HAT, Griffin CS, Yamasaki E, Drumm BT, Lane C, et al.  
1177 TRPML1 channels initiate Ca(2+) sparks in vascular smooth muscle cells. *Sci Signal*.  
1178 2020;13(637).
- 1179 52. Pritchard HAT, Gonzales AL, Pires PW, Drumm BT, Ko EA, Sanders KM, et al.  
1180 Microtubule structures underlying the sarcoplasmic reticulum support peripheral coupling  
1181 sites to regulate smooth muscle contractility. *Sci Signal*. 2017;10(497):eaan2694.
- 1182 53. Bolte S, Cordelières FP. A guided tour into subcellular colocalization analysis in  
1183 light microscopy. *Journal of microscopy*. 2006;224(Pt 3):213-32.
- 1184 54. Lachmanovich E, Shvartsman DE, Malka Y, Botvin C, Henis YI, Weiss AM. Co-  
1185 localization analysis of complex formation among membrane proteins by computerized  
1186 fluorescence microscopy: application to immunofluorescence co-patching studies.  
1187 *Journal of microscopy*. 2003;212(Pt 2):122-31.
- 1188 55. Griffin CS, Alvarado MG, Yamasaki E, Drumm BT, Krishnan V, Ali S, et al. The  
1189 intracellular Ca<sup>2+</sup> release channel TRPML1 regulates lower urinary tract  
1190 smooth muscle contractility. *Proceedings of the National Academy of Sciences*.  
1191 2020;117(48):30775-86.
- 1192 56. Pritchard HAT, Pires PW, Yamasaki E, Thakore P, Earley S. Nanoscale  
1193 remodeling of ryanodine receptor cluster size underlies cerebral microvascular  
1194 dysfunction in Duchenne muscular dystrophy. *Proceedings of the National Academy of  
1195 Sciences*. 2018;115(41):E9745-E52.
- 1196 57. Launay P, Fleig A, Perraud A-L, Scharenberg AM, Penner R, Kinet J-P. TRPM4 Is  
1197 a Ca<sup>2+</sup>-Activated Nonselective Cation Channel Mediating Cell Membrane Depolarization.  
1198 *Cell*. 2002;109(3):397-407.
- 1199 58. Earley S, Straub SV, Brayden JE. Protein kinase C regulates vascular myogenic  
1200 tone through activation of TRPM4. *Am J Physiol Heart Circ Physiol*. 2007;292(6):H2613-  
1201 H22.
- 1202 59. Gonzales AL, Garcia ZI, Amberg GC, Earley S. Pharmacological inhibition of  
1203 TRPM4 hyperpolarizes vascular smooth muscle. *Am J Physiol Cell Physiol*.  
1204 2010;299(5):C1195-C202.
- 1205 60. Gonzales AL, Amberg GC, Earley S. Ca<sup>2+</sup> release from the sarcoplasmic  
1206 reticulum is required for sustained TRPM4 activity in cerebral artery smooth muscle cells.  
1207 *American journal of physiology Cell physiology*. 2010;299(2):C279-88.



- 1208 61. Amarouch M-Y, Syam N, Abriel H. Biochemical, single-channel, whole-cell patch  
1209 clamp, and pharmacological analyses of endogenous TRPM4 channels in HEK293 cells.  
1210 *Neuroscience Letters*. 2013;541:105-10.
- 1211 62. Earley S, Waldron BJ, Brayden JE. Critical role for transient receptor potential  
1212 channel TRPM4 in myogenic constriction of cerebral arteries. *Circ Res*. 2004;95(9):922-  
1213 9.
- 1214 63. Li W, Peng H, Mehaffey EP, Kimball CD, Grobe JL, van Gool JM, et al. Neuron-  
1215 specific (pro)renin receptor knockout prevents the development of salt-sensitive  
1216 hypertension. *Hypertension*. 2014;63(2):316-23.
- 1217 64. Beavers DL, Landstrom AP, Chiang DY, Wehrens XH. Emerging roles of  
1218 junctophilin-2 in the heart and implications for cardiac diseases. *Cardiovasc Res*.  
1219 2014;103(2):198-205.
- 1220 65. Landstrom AP, Beavers DL, Wehrens XH. The junctophilin family of proteins: from  
1221 bench to bedside. *Trends Mol Med*. 2014;20(6):353-62.
- 1222 66. Takeshima H, Komazaki S, Nishi M, Iino M, Kangawa K. Junctophilins: a novel  
1223 family of junctional membrane complex proteins. *Mol Cell*. 2000;6(1):11-22.
- 1224 67. Knudson CM, Stang KK, Moomaw CR, Slaughter CA, Campbell KP. Primary  
1225 structure and topological analysis of a skeletal muscle-specific junctional sarcoplasmic  
1226 reticulum glycoprotein (triadin). *J Biol Chem*. 1993;268(17):12646-54.
- 1227 68. Marty I. Triadin regulation of the ryanodine receptor complex. *J Physiol*.  
1228 2015;593(15):3261-6.
- 1229 69. Luik RM, Wang B, Prakriya M, Wu MM, Lewis RS. Oligomerization of STIM1  
1230 couples ER calcium depletion to CRAC channel activation. *Nature*. 2008;454(7203):538-  
1231 42.
- 1232 70. Brandman O, Liou J, Park WS, Meyer T. STIM2 is a feedback regulator that  
1233 stabilizes basal cytosolic and endoplasmic reticulum Ca<sup>2+</sup> levels. *Cell*.  
1234 2007;131(7):1327-39.
- 1235 71. Zhang W, Halligan KE, Zhang X, Bisailon JM, Gonzalez-Cobos JC, Motiani RK,  
1236 et al. Orai1-mediated I (CRAC) is essential for neointima formation after vascular injury.  
1237 *Circ Res*. 2011;109(5):534-42.
- 1238 72. Sato D, Hernandez-Hernandez G, Matsumoto C, Tajada S, Moreno CM, Dixon RE,  
1239 et al. A stochastic model of ion channel cluster formation in the plasma membrane. *J Gen  
1240 Physiol*. 2019;151(9):1116-34.
- 1241 73. Béliveau É, Lessard V, Guillemette G. STIM1 Positively Regulates the Ca<sup>2+</sup>  
1242 Release Activity of the Inositol 1,4,5-Trisphosphate Receptor in Bovine Aortic Endothelial  
1243 Cells. *PLOS ONE*. 2014;9(12):e114718.
- 1244 74. Sampieri A, Santoyo K, Asanov A, Vaca L. Association of the IP3R to STIM1  
1245 provides a reduced intraluminal calcium microenvironment, resulting in enhanced store-  
1246 operated calcium entry. *Sci Rep*. 2018;8(1):13252.
- 1247 75. Kassan M, Zhang W, Aissa KA, Stolwijk J, Trebak M, Matrougui K. Differential role  
1248 for stromal interacting molecule 1 in the regulation of vascular function. *Pflugers Archiv :  
1249 European journal of physiology*. 2015;467(6):1195-202.
- 1250 76. Kassan M, Ait-Aissa K, Radwan E, Mali V, Haddox S, Gabani M, et al. Essential  
1251 Role of Smooth Muscle STIM1 in Hypertension and Cardiovascular Dysfunction.  
1252 *Arterioscler Thromb Vasc Biol*. 2016;36(9):1900-9.

- 1253 77. Pichavaram P, Yin W, Evanson KW, Jaggar JH, Mancarella S. Elevated plasma  
1254 catecholamines functionally compensate for the reduced myogenic tone in smooth  
1255 muscle STIM1 knockout mice but with deleterious cardiac effects. *Cardiovasc Res.*  
1256 2018;114(5):668-78.
- 1257 78. Chen BC, Legant WR, Wang K, Shao L, Milkie DE, Davidson MW, et al. Lattice  
1258 light-sheet microscopy: imaging molecules to embryos at high spatiotemporal resolution.  
1259 *Science.* 2014;346(6208):1257998.

1260
